# Supplementary material for: Development of Genomic Resources and Identification of Genetic Diversity and Genetic Structure of the Domestic Bactrian Camel in China by RAD Sequencing
Source: Front Genet. 2020 Jul 30;11:797. doi: 10.3389/fgene.2020.00797 (PMC7406665; doi:10.3389/fgene.2020.00797)
Supplement: Supplementary file 6 [file Table_2.XLSX]

## Sheet: S2 Table
NW_011510931.1	1	1000000	310
NW_011510931.1	1000001	2000000	716
NW_011510931.1	2000001	3000000	722
NW_011510931.1	3000001	4000000	1011
NW_011510931.1	4000001	5000000	957
NW_011510931.1	5000001	6000000	905
NW_011510931.1	6000001	7000000	660
NW_011510931.1	7000001	8000000	364
NW_011510931.1	8000001	9000000	460
NW_011510931.1	9000001	10000000	675
NW_011510931.1	10000001	11000000	597
NW_011510931.1	11000001	12000000	611
NW_011510931.1	12000001	13000000	694
NW_011510931.1	13000001	14000000	467
NW_011510931.1	14000001	14027634	52
NW_011511147.1	1	1000000	1253
NW_011511147.1	1000001	2000000	1088
NW_011511147.1	2000001	3000000	1204
NW_011511147.1	3000001	4000000	476
NW_011511147.1	4000001	5000000	544
NW_011511147.1	5000001	6000000	675
NW_011511147.1	6000001	7000000	495
NW_011511147.1	7000001	8000000	406
NW_011511147.1	8000001	9000000	814
NW_011511147.1	9000001	10000000	634
NW_011511147.1	10000001	11000000	728
NW_011511147.1	11000001	12000000	1037
NW_011511147.1	12000001	13000000	934
NW_011511147.1	13000001	14000000	1032
NW_011511147.1	14000001	15000000	1315
NW_011511147.1	15000001	16000000	1051
NW_011511147.1	16000001	17000000	1465
NW_011511147.1	17000001	18000000	1121
NW_011511147.1	18000001	19000000	1224
NW_011511147.1	19000001	20000000	882
NW_011511147.1	20000001	20430167	309
NW_011511150.1	1	1000000	1534
NW_011511150.1	1000001	2000000	1477
NW_011511150.1	2000001	3000000	1096
NW_011511150.1	3000001	4000000	645
NW_011511150.1	4000001	5000000	417
NW_011511150.1	5000001	6000000	601
NW_011511150.1	6000001	7000000	1039
NW_011511150.1	7000001	8000000	1214
NW_011511150.1	8000001	9000000	1164
NW_011511150.1	9000001	10000000	614
NW_011511150.1	10000001	11000000	732
NW_011511150.1	11000001	12000000	1306
NW_011511150.1	12000001	13000000	1343
NW_011511150.1	13000001	14000000	1017
NW_011511150.1	14000001	15000000	829
NW_011511150.1	15000001	15556111	359
NW_011511552.1	1	1000000	1145
NW_011511552.1	1000001	2000000	974
NW_011511552.1	2000001	3000000	816
NW_011511552.1	3000001	4000000	649
NW_011511552.1	4000001	5000000	921
NW_011511552.1	5000001	6000000	846
NW_011511552.1	6000001	7000000	1054
NW_011511552.1	7000001	8000000	681
NW_011511552.1	8000001	9000000	784
NW_011511552.1	9000001	10000000	796
NW_011511552.1	10000001	11000000	1355
NW_011511552.1	11000001	12000000	1262
NW_011511552.1	12000001	13000000	888
NW_011511552.1	13000001	13872274	1218
NW_011511553.1	1	1000000	670
NW_011511553.1	1000001	2000000	617
NW_011511553.1	2000001	3000000	498
NW_011511553.1	3000001	4000000	749
NW_011511553.1	4000001	5000000	709
NW_011511553.1	5000001	6000000	608
NW_011511553.1	6000001	7000000	471
NW_011511553.1	7000001	8000000	520
NW_011511553.1	8000001	9000000	563
NW_011511553.1	9000001	10000000	710
NW_011511553.1	10000001	11000000	484
NW_011511553.1	11000001	12000000	715
NW_011511553.1	12000001	12179719	103
NW_011511605.1	1	1000000	827
NW_011511605.1	1000001	2000000	458
NW_011511605.1	2000001	3000000	467
NW_011511605.1	3000001	4000000	566
NW_011511605.1	4000001	5000000	557
NW_011511605.1	5000001	6000000	601
NW_011511605.1	6000001	7000000	679
NW_011511605.1	7000001	8000000	572
NW_011511605.1	8000001	9000000	258
NW_011511605.1	9000001	10000000	341
NW_011511605.1	10000001	11000000	496
NW_011511605.1	11000001	12000000	1278
NW_011511605.1	12000001	13000000	1383
NW_011511605.1	13000001	14000000	1348
NW_011511605.1	14000001	15000000	1220
NW_011511605.1	15000001	16000000	923
NW_011511605.1	16000001	17000000	1262
NW_011511605.1	17000001	18000000	707
NW_011511605.1	18000001	19000000	547
NW_011511605.1	19000001	20000000	586
NW_011511605.1	20000001	21000000	318
NW_011511605.1	21000001	22000000	590
NW_011511605.1	22000001	23000000	990
NW_011511605.1	23000001	24000000	921
NW_011511605.1	24000001	24672720	606
NW_011511611.1	1	1000000	702
NW_011511611.1	1000001	2000000	886
NW_011511611.1	2000001	3000000	1553
NW_011511611.1	3000001	4000000	596
NW_011511611.1	4000001	5000000	830
NW_011511611.1	5000001	6000000	542
NW_011511611.1	6000001	7000000	584
NW_011511611.1	7000001	8000000	497
NW_011511611.1	8000001	9000000	462
NW_011511611.1	9000001	10000000	452
NW_011511611.1	10000001	10784093	394
NW_011511680.1	1	1000000	1244
NW_011511680.1	1000001	2000000	1319
NW_011511680.1	2000001	3000000	551
NW_011511680.1	3000001	4000000	755
NW_011511680.1	4000001	5000000	482
NW_011511680.1	5000001	6000000	589
NW_011511680.1	6000001	7000000	412
NW_011511680.1	7000001	8000000	257
NW_011511680.1	8000001	9000000	884
NW_011511680.1	9000001	10000000	885
NW_011511680.1	10000001	11000000	1293
NW_011511680.1	11000001	12000000	1300
NW_011511680.1	12000001	13000000	1079
NW_011511680.1	13000001	14000000	912
NW_011511680.1	14000001	14283732	352
NW_011511773.1	1	1000000	861
NW_011511773.1	1000001	2000000	925
NW_011511773.1	2000001	3000000	585
NW_011511773.1	3000001	4000000	705
NW_011511773.1	4000001	5000000	740
NW_011511773.1	5000001	6000000	773
NW_011511773.1	6000001	7000000	903
NW_011511773.1	7000001	8000000	846
NW_011511773.1	8000001	9000000	741
NW_011511773.1	9000001	10000000	909
NW_011511773.1	10000001	11000000	723
NW_011511773.1	11000001	12000000	535
NW_011511773.1	12000001	13000000	370
NW_011511773.1	13000001	13333760	287
NW_011512444.1	1	1000000	1455
NW_011512444.1	1000001	2000000	1171
NW_011512444.1	2000001	3000000	587
NW_011512444.1	3000001	4000000	763
NW_011512444.1	4000001	5000000	871
NW_011512444.1	5000001	6000000	1041
NW_011512444.1	6000001	7000000	1118
NW_011512444.1	7000001	8000000	924
NW_011512444.1	8000001	9000000	951
NW_011512444.1	9000001	10000000	930
NW_011512444.1	10000001	10668409	581
NW_011512597.1	1	1000000	865
NW_011512597.1	1000001	2000000	791
NW_011512597.1	2000001	3000000	728
NW_011512597.1	3000001	4000000	884
NW_011512597.1	4000001	5000000	549
NW_011512597.1	5000001	6000000	585
NW_011512597.1	6000001	7000000	592
NW_011512597.1	7000001	8000000	985
NW_011512597.1	8000001	9000000	1016
NW_011512597.1	9000001	10000000	766
NW_011512597.1	10000001	11000000	730
NW_011512597.1	11000001	12000000	690
NW_011512597.1	12000001	13000000	652
NW_011512597.1	13000001	14000000	605
NW_011512597.1	14000001	15000000	818
NW_011512597.1	15000001	16000000	604
NW_011512597.1	16000001	17000000	695
NW_011512597.1	17000001	18000000	805
NW_011512597.1	18000001	19000000	695
NW_011512597.1	19000001	19607279	248
NW_011512850.1	1	1000000	924
NW_011512850.1	1000001	2000000	529
NW_011512850.1	2000001	3000000	473
NW_011512850.1	3000001	4000000	576
NW_011512850.1	4000001	5000000	463
NW_011512850.1	5000001	6000000	393
NW_011512850.1	6000001	7000000	692
NW_011512850.1	7000001	8000000	530
NW_011512850.1	8000001	9000000	342
NW_011512850.1	9000001	10000000	617
NW_011512850.1	10000001	10974801	503
NW_011512859.1	1	1000000	1345
NW_011512859.1	1000001	2000000	1547
NW_011512859.1	2000001	3000000	766
NW_011512859.1	3000001	4000000	908
NW_011512859.1	4000001	5000000	1269
NW_011512859.1	5000001	6000000	1007
NW_011512859.1	6000001	7000000	664
NW_011512859.1	7000001	8000000	612
NW_011512859.1	8000001	9000000	481
NW_011512859.1	9000001	10000000	440
NW_011512859.1	10000001	11000000	560
NW_011512859.1	11000001	12000000	620
NW_011512859.1	12000001	13000000	670
NW_011512859.1	13000001	14000000	609
NW_011512859.1	14000001	15000000	632
NW_011512859.1	15000001	16000000	952
NW_011512859.1	16000001	17000000	882
NW_011512859.1	17000001	18000000	729
NW_011512859.1	18000001	19000000	888
NW_011512859.1	19000001	20000000	1795
NW_011512859.1	20000001	20205338	294
NW_011513121.1	1	1000000	397
NW_011513121.1	1000001	2000000	387
NW_011513121.1	2000001	3000000	784
NW_011513121.1	3000001	4000000	748
NW_011513121.1	4000001	5000000	536
NW_011513121.1	5000001	6000000	484
NW_011513121.1	6000001	7000000	576
NW_011513121.1	7000001	8000000	511
NW_011513121.1	8000001	9000000	898
NW_011513121.1	9000001	10000000	789
NW_011513121.1	10000001	11000000	867
NW_011513121.1	11000001	11970513	674
NW_011513243.1	1	1000000	590
NW_011513243.1	1000001	2000000	696
NW_011513243.1	2000001	3000000	665
NW_011513243.1	3000001	4000000	784
NW_011513243.1	4000001	5000000	798
NW_011513243.1	5000001	6000000	814
NW_011513243.1	6000001	7000000	776
NW_011513243.1	7000001	8000000	576
NW_011513243.1	8000001	9000000	360
NW_011513243.1	9000001	10000000	541
NW_011513243.1	10000001	11000000	428
NW_011513243.1	11000001	12000000	284
NW_011513243.1	12000001	13000000	257
NW_011513243.1	13000001	14000000	332
NW_011513243.1	14000001	15000000	383
NW_011513243.1	15000001	16000000	498
NW_011513243.1	16000001	17000000	641
NW_011513243.1	17000001	18000000	658
NW_011513243.1	18000001	19000000	688
NW_011513243.1	19000001	20000000	815
NW_011513243.1	20000001	21000000	571
NW_011513243.1	21000001	22000000	625
NW_011513243.1	22000001	23000000	769
NW_011513243.1	23000001	24000000	470
NW_011513243.1	24000001	24937548	491
NW_011513270.1	1	1000000	1030
NW_011513270.1	1000001	2000000	1068
NW_011513270.1	2000001	3000000	521
NW_011513270.1	3000001	4000000	581
NW_011513270.1	4000001	5000000	803
NW_011513270.1	5000001	6000000	1168
NW_011513270.1	6000001	7000000	1012
NW_011513270.1	7000001	8000000	1143
NW_011513270.1	8000001	9000000	1478
NW_011513270.1	9000001	10000000	740
NW_011513270.1	10000001	11000000	773
NW_011513270.1	11000001	12000000	900
NW_011513270.1	12000001	13000000	1128
NW_011513270.1	13000001	14000000	1175
NW_011513270.1	14000001	15000000	1070
NW_011513270.1	15000001	16000000	883
NW_011513270.1	16000001	17000000	1613
NW_011513270.1	17000001	17673402	801
NW_011513299.1	1	1000000	493
NW_011513299.1	1000001	2000000	626
NW_011513299.1	2000001	3000000	550
NW_011513299.1	3000001	4000000	647
NW_011513299.1	4000001	5000000	649
NW_011513299.1	5000001	6000000	627
NW_011513299.1	6000001	7000000	519
NW_011513299.1	7000001	8000000	660
NW_011513299.1	8000001	9000000	689
NW_011513299.1	9000001	10000000	670
NW_011513299.1	10000001	11000000	560
NW_011513299.1	11000001	12000000	654
NW_011513299.1	12000001	13000000	435
NW_011513299.1	13000001	14000000	530
NW_011513299.1	14000001	15000000	558
NW_011513299.1	15000001	16000000	798
NW_011513299.1	16000001	16458004	457
NW_011513524.1	1	1000000	806
NW_011513524.1	1000001	2000000	1084
NW_011513524.1	2000001	3000000	1199
NW_011513524.1	3000001	4000000	1331
NW_011513524.1	4000001	5000000	1295
NW_011513524.1	5000001	6000000	981
NW_011513524.1	6000001	7000000	1293
NW_011513524.1	7000001	8000000	1294
NW_011513524.1	8000001	9000000	900
NW_011513524.1	9000001	10000000	597
NW_011513524.1	10000001	11000000	946
NW_011513524.1	11000001	11934751	1476
NW_011513546.1	1	1000000	543
NW_011513546.1	1000001	2000000	468
NW_011513546.1	2000001	3000000	651
NW_011513546.1	3000001	4000000	701
NW_011513546.1	4000001	5000000	653
NW_011513546.1	5000001	6000000	511
NW_011513546.1	6000001	7000000	566
NW_011513546.1	7000001	8000000	618
NW_011513546.1	8000001	9000000	977
NW_011513546.1	9000001	10000000	812
NW_011513546.1	10000001	11000000	642
NW_011513546.1	11000001	12000000	772
NW_011513546.1	12000001	12000580	0
NW_011513750.1	1	1000000	675
NW_011513750.1	1000001	2000000	864
NW_011513750.1	2000001	3000000	579
NW_011513750.1	3000001	4000000	667
NW_011513750.1	4000001	5000000	659
NW_011513750.1	5000001	6000000	909
NW_011513750.1	6000001	7000000	910
NW_011513750.1	7000001	8000000	688
NW_011513750.1	8000001	9000000	873
NW_011513750.1	9000001	10000000	869
NW_011513750.1	10000001	11000000	860
NW_011513750.1	11000001	12000000	1032
NW_011513750.1	12000001	12704332	540
NW_011513933.1	1	1000000	480
NW_011513933.1	1000001	2000000	767
NW_011513933.1	2000001	3000000	630
NW_011513933.1	3000001	4000000	457
NW_011513933.1	4000001	5000000	517
NW_011513933.1	5000001	6000000	661
NW_011513933.1	6000001	7000000	1024
NW_011513933.1	7000001	8000000	1863
NW_011513933.1	8000001	9000000	696
NW_011513933.1	9000001	10000000	985
NW_011513933.1	10000001	11000000	1070
NW_011513933.1	11000001	11054148	93
NW_011514130.1	1	1000000	1680
NW_011514130.1	1000001	2000000	1014
NW_011514130.1	2000001	3000000	1122
NW_011514130.1	3000001	4000000	698
NW_011514130.1	4000001	5000000	1508
NW_011514130.1	5000001	6000000	1699
NW_011514130.1	6000001	7000000	1166
NW_011514130.1	7000001	8000000	1087
NW_011514130.1	8000001	9000000	1400
NW_011514130.1	9000001	10000000	960
NW_011514130.1	10000001	11000000	1304
NW_011514130.1	11000001	12000000	1221
NW_011514130.1	12000001	13000000	642
NW_011514130.1	13000001	14000000	370
NW_011514130.1	14000001	15000000	579
NW_011514130.1	15000001	16000000	816
NW_011514130.1	16000001	17000000	515
NW_011514130.1	17000001	17700578	327
NW_011514262.1	1	1000000	301
NW_011514262.1	1000001	2000000	459
NW_011514262.1	2000001	3000000	413
NW_011514262.1	3000001	4000000	861
NW_011514262.1	4000001	5000000	870
NW_011514262.1	5000001	6000000	426
NW_011514262.1	6000001	7000000	558
NW_011514262.1	7000001	8000000	886
NW_011514262.1	8000001	9000000	850
NW_011514262.1	9000001	10000000	747
NW_011514262.1	10000001	11000000	781
NW_011514262.1	11000001	12000000	580
NW_011514262.1	12000001	13000000	551
NW_011514262.1	13000001	14000000	1179
NW_011514262.1	14000001	15000000	751
NW_011514262.1	15000001	16000000	487
NW_011514262.1	16000001	17000000	370
NW_011514262.1	17000001	17727895	753
NW_011514272.1	1	1000000	1099
NW_011514272.1	1000001	2000000	738
NW_011514272.1	2000001	3000000	734
NW_011514272.1	3000001	4000000	707
NW_011514272.1	4000001	5000000	631
NW_011514272.1	5000001	6000000	783
NW_011514272.1	6000001	7000000	758
NW_011514272.1	7000001	8000000	539
NW_011514272.1	8000001	9000000	417
NW_011514272.1	9000001	10000000	496
NW_011514272.1	10000001	11000000	680
NW_011514272.1	11000001	12000000	497
NW_011514272.1	12000001	13000000	496
NW_011514272.1	13000001	14000000	815
NW_011514272.1	14000001	14875946	660
NW_011514468.1	1	1000000	811
NW_011514468.1	1000001	2000000	724
NW_011514468.1	2000001	3000000	897
NW_011514468.1	3000001	4000000	1352
NW_011514468.1	4000001	5000000	827
NW_011514468.1	5000001	6000000	696
NW_011514468.1	6000001	7000000	640
NW_011514468.1	7000001	8000000	732
NW_011514468.1	8000001	9000000	782
NW_011514468.1	9000001	10000000	719
NW_011514468.1	10000001	10235142	182
NW_011514637.1	1	1000000	1051
NW_011514637.1	1000001	2000000	1105
NW_011514637.1	2000001	3000000	934
NW_011514637.1	3000001	4000000	967
NW_011514637.1	4000001	5000000	1109
NW_011514637.1	5000001	6000000	887
NW_011514637.1	6000001	7000000	921
NW_011514637.1	7000001	8000000	1078
NW_011514637.1	8000001	9000000	899
NW_011514637.1	9000001	10000000	1000
NW_011514637.1	10000001	11000000	544
NW_011514637.1	11000001	12000000	573
NW_011514637.1	12000001	13000000	692
NW_011514637.1	13000001	14000000	925
NW_011514637.1	14000001	15000000	781
NW_011514637.1	15000001	16000000	1367
NW_011514637.1	16000001	16165641	203
NW_011514683.1	1	1000000	717
NW_011514683.1	1000001	2000000	725
NW_011514683.1	2000001	3000000	744
NW_011514683.1	3000001	4000000	948
NW_011514683.1	4000001	5000000	984
NW_011514683.1	5000001	6000000	754
NW_011514683.1	6000001	7000000	685
NW_011514683.1	7000001	8000000	876
NW_011514683.1	8000001	9000000	892
NW_011514683.1	9000001	10000000	1021
NW_011514683.1	10000001	11000000	1394
NW_011514683.1	11000001	11315732	206
NW_011514758.1	1	1000000	1119
NW_011514758.1	1000001	2000000	923
NW_011514758.1	2000001	3000000	949
NW_011514758.1	3000001	4000000	719
NW_011514758.1	4000001	5000000	909
NW_011514758.1	5000001	6000000	905
NW_011514758.1	6000001	7000000	906
NW_011514758.1	7000001	8000000	950
NW_011514758.1	8000001	9000000	981
NW_011514758.1	9000001	10000000	1797
NW_011514758.1	10000001	11000000	1555
NW_011514758.1	11000001	11616875	995
NW_011514844.1	1	1000000	469
NW_011514844.1	1000001	2000000	415
NW_011514844.1	2000001	3000000	529
NW_011514844.1	3000001	4000000	879
NW_011514844.1	4000001	5000000	1203
NW_011514844.1	5000001	6000000	1083
NW_011514844.1	6000001	7000000	1033
NW_011514844.1	7000001	8000000	788
NW_011514844.1	8000001	9000000	865
NW_011514844.1	9000001	10000000	812
NW_011514844.1	10000001	10874860	860
NW_011514982.1	1	1000000	1381
NW_011514982.1	1000001	2000000	988
NW_011514982.1	2000001	3000000	1618
NW_011514982.1	3000001	4000000	1082
NW_011514982.1	4000001	5000000	868
NW_011514982.1	5000001	6000000	1045
NW_011514982.1	6000001	7000000	574
NW_011514982.1	7000001	8000000	656
NW_011514982.1	8000001	9000000	983
NW_011514982.1	9000001	10000000	1042
NW_011514982.1	10000001	11000000	959
NW_011514982.1	11000001	12000000	848
NW_011514982.1	12000001	12672740	856
NW_011514985.1	1	1000000	811
NW_011514985.1	1000001	2000000	534
NW_011514985.1	2000001	3000000	474
NW_011514985.1	3000001	4000000	566
NW_011514985.1	4000001	5000000	575
NW_011514985.1	5000001	6000000	750
NW_011514985.1	6000001	7000000	807
NW_011514985.1	7000001	8000000	568
NW_011514985.1	8000001	9000000	612
NW_011514985.1	9000001	10000000	324
NW_011514985.1	10000001	11000000	578
NW_011514985.1	11000001	12000000	639
NW_011514985.1	12000001	13000000	679
NW_011514985.1	13000001	14000000	991
NW_011514985.1	14000001	15000000	627
NW_011514985.1	15000001	16000000	715
NW_011514985.1	16000001	17000000	638
NW_011514985.1	17000001	18000000	641
NW_011514985.1	18000001	18747691	423
NW_011515224.1	1	1000000	1096
NW_011515224.1	1000001	2000000	947
NW_011515224.1	2000001	3000000	863
NW_011515224.1	3000001	4000000	994
NW_011515224.1	4000001	5000000	826
NW_011515224.1	5000001	6000000	872
NW_011515224.1	6000001	7000000	810
NW_011515224.1	7000001	8000000	1421
NW_011515224.1	8000001	9000000	1182
NW_011515224.1	9000001	10000000	994
NW_011515224.1	10000001	11000000	726
NW_011515224.1	11000001	12000000	1032
NW_011515224.1	12000001	13000000	1162
NW_011515224.1	13000001	14000000	819
NW_011515224.1	14000001	15000000	1385
NW_011515224.1	15000001	15090592	104
NW_011515408.1	1	1000000	619
NW_011515408.1	1000001	2000000	739
NW_011515408.1	2000001	3000000	711
NW_011515408.1	3000001	4000000	768
NW_011515408.1	4000001	5000000	376
NW_011515408.1	5000001	6000000	484
NW_011515408.1	6000001	7000000	399
NW_011515408.1	7000001	8000000	623
NW_011515408.1	8000001	9000000	656
NW_011515408.1	9000001	10000000	707
NW_011515408.1	10000001	11000000	687
NW_011515408.1	11000001	12000000	468
NW_011515408.1	12000001	13000000	704
NW_011515408.1	13000001	14000000	591
NW_011515408.1	14000001	15000000	885
NW_011515408.1	15000001	15534165	615
NW_011515567.1	1	1000000	1033
NW_011515567.1	1000001	2000000	1344
NW_011515567.1	2000001	3000000	1306
NW_011515567.1	3000001	4000000	978
NW_011515567.1	4000001	5000000	1195
NW_011515567.1	5000001	6000000	870
NW_011515567.1	6000001	7000000	667
NW_011515567.1	7000001	8000000	492
NW_011515567.1	8000001	9000000	563
NW_011515567.1	9000001	10000000	487
NW_011515567.1	10000001	11000000	818
NW_011515567.1	11000001	11704511	602
NW_011515601.1	1	1000000	1032
NW_011515601.1	1000001	2000000	994
NW_011515601.1	2000001	3000000	492
NW_011515601.1	3000001	4000000	1128
NW_011515601.1	4000001	5000000	1205
NW_011515601.1	5000001	6000000	973
NW_011515601.1	6000001	7000000	900
NW_011515601.1	7000001	8000000	728
NW_011515601.1	8000001	9000000	1052
NW_011515601.1	9000001	10000000	1222
NW_011515601.1	10000001	10911568	628
NW_011515627.1	1	1000000	690
NW_011515627.1	1000001	2000000	920
NW_011515627.1	2000001	3000000	1366
NW_011515627.1	3000001	4000000	971
NW_011515627.1	4000001	5000000	1023
NW_011515627.1	5000001	6000000	687
NW_011515627.1	6000001	7000000	861
NW_011515627.1	7000001	8000000	1025
NW_011515627.1	8000001	9000000	1168
NW_011515627.1	9000001	10000000	1382
NW_011515627.1	10000001	11000000	1147
NW_011515627.1	11000001	11270419	240
NW_011515632.1	1	1000000	1431
NW_011515632.1	1000001	2000000	1322
NW_011515632.1	2000001	3000000	1132
NW_011515632.1	3000001	4000000	1011
NW_011515632.1	4000001	5000000	586
NW_011515632.1	5000001	6000000	569
NW_011515632.1	6000001	7000000	587
NW_011515632.1	7000001	8000000	396
NW_011515632.1	8000001	9000000	538
NW_011515632.1	9000001	10000000	427
NW_011515632.1	10000001	10661602	272
NW_011515636.1	1	1000000	1058
NW_011515636.1	1000001	2000000	940
NW_011515636.1	2000001	3000000	1385
NW_011515636.1	3000001	4000000	1579
NW_011515636.1	4000001	5000000	1694
NW_011515636.1	5000001	6000000	1171
NW_011515636.1	6000001	7000000	1364
NW_011515636.1	7000001	8000000	1674
NW_011515636.1	8000001	9000000	1509
NW_011515636.1	9000001	10000000	1484
NW_011515636.1	10000001	11000000	1234
NW_011515636.1	11000001	12000000	1181
NW_011515636.1	12000001	13000000	928
NW_011515636.1	13000001	14000000	1017
NW_011515636.1	14000001	15000000	1126
NW_011515636.1	15000001	16000000	952
NW_011515636.1	16000001	17000000	429
NW_011515636.1	17000001	18000000	678
NW_011515636.1	18000001	18309869	1333
NW_011516265.1	1	1000000	1834
NW_011516265.1	1000001	2000000	531
NW_011516265.1	2000001	3000000	847
NW_011516265.1	3000001	4000000	842
NW_011516265.1	4000001	5000000	540
NW_011516265.1	5000001	6000000	918
NW_011516265.1	6000001	7000000	1235
NW_011516265.1	7000001	8000000	1241
NW_011516265.1	8000001	9000000	1287
NW_011516265.1	9000001	10000000	1132
NW_011516265.1	10000001	11000000	827
NW_011516265.1	11000001	12000000	751
NW_011516265.1	12000001	13000000	905
NW_011516265.1	13000001	14000000	827
NW_011516265.1	14000001	15000000	1187
NW_011516265.1	15000001	16000000	1250
NW_011516265.1	16000001	17000000	1151
NW_011516265.1	17000001	18000000	1222
NW_011516265.1	18000001	19000000	1021
NW_011516265.1	19000001	20000000	960
NW_011516265.1	20000001	21000000	775
NW_011516265.1	21000001	22000000	540
NW_011516265.1	22000001	23000000	743
NW_011516265.1	23000001	24000000	408
NW_011516265.1	24000001	25000000	640
NW_011516265.1	25000001	26000000	556
NW_011516265.1	26000001	27000000	485
NW_011516265.1	27000001	28000000	554
NW_011516265.1	28000001	29000000	658
NW_011516265.1	29000001	30000000	582
NW_011516265.1	30000001	31000000	572
NW_011516265.1	31000001	32000000	521
NW_011516265.1	32000001	32057944	67
NW_011516268.1	1	1000000	1013
NW_011516268.1	1000001	2000000	902
NW_011516268.1	2000001	3000000	644
NW_011516268.1	3000001	4000000	690
NW_011516268.1	4000001	5000000	797
NW_011516268.1	5000001	6000000	602
NW_011516268.1	6000001	7000000	424
NW_011516268.1	7000001	8000000	356
NW_011516268.1	8000001	9000000	569
NW_011516268.1	9000001	10000000	537
NW_011516268.1	10000001	11000000	870
NW_011516268.1	11000001	12000000	863
NW_011516268.1	12000001	13000000	1276
NW_011516268.1	13000001	14000000	679
NW_011516268.1	14000001	14496649	287
NW_011516269.1	1	1000000	800
NW_011516269.1	1000001	2000000	889
NW_011516269.1	2000001	3000000	463
NW_011516269.1	3000001	4000000	522
NW_011516269.1	4000001	5000000	355
NW_011516269.1	5000001	6000000	385
NW_011516269.1	6000001	7000000	367
NW_011516269.1	7000001	8000000	382
NW_011516269.1	8000001	9000000	693
NW_011516269.1	9000001	10000000	664
NW_011516269.1	10000001	11000000	656
NW_011516269.1	11000001	12000000	572
NW_011516269.1	12000001	13000000	589
NW_011516269.1	13000001	14000000	531
NW_011516269.1	14000001	15000000	582
NW_011516269.1	15000001	16000000	677
NW_011516269.1	16000001	17000000	920
NW_011516269.1	17000001	18000000	562
NW_011516269.1	18000001	19000000	584
NW_011516269.1	19000001	20000000	571
NW_011516269.1	20000001	21000000	677
NW_011516269.1	21000001	22000000	1096
NW_011516269.1	22000001	23000000	740
NW_011516269.1	23000001	24000000	825
NW_011516269.1	24000001	25000000	856
NW_011516269.1	25000001	26000000	994
NW_011516269.1	26000001	27000000	1461
NW_011516269.1	27000001	28000000	1236
NW_011516269.1	28000001	29000000	870
NW_011516269.1	29000001	30000000	1064
NW_011516269.1	30000001	31000000	1378
NW_011516269.1	31000001	32000000	1262
NW_011516269.1	32000001	33000000	1354
NW_011516269.1	33000001	34000000	1277
NW_011516269.1	34000001	35000000	1142
NW_011516269.1	35000001	36000000	804
NW_011516269.1	36000001	37000000	928
NW_011516269.1	37000001	38000000	1340
NW_011516269.1	38000001	39000000	1641
NW_011516269.1	39000001	40000000	1012
NW_011516269.1	40000001	41000000	707
NW_011516269.1	41000001	42000000	624
NW_011516269.1	42000001	43000000	834
NW_011516269.1	43000001	44000000	747
NW_011516269.1	44000001	45000000	1496
NW_011516269.1	45000001	46000000	703
NW_011516269.1	46000001	46538883	656
NW_011516528.1	1	1000000	595
NW_011516528.1	1000001	2000000	579
NW_011516528.1	2000001	3000000	744
NW_011516528.1	3000001	4000000	620
NW_011516528.1	4000001	5000000	513
NW_011516528.1	5000001	6000000	326
NW_011516528.1	6000001	7000000	492
NW_011516528.1	7000001	8000000	520
NW_011516528.1	8000001	9000000	604
NW_011516528.1	9000001	10000000	613
NW_011516528.1	10000001	11000000	680
NW_011516528.1	11000001	12000000	441
NW_011516528.1	12000001	12076045	69
NW_011516552.1	1	1000000	1476
NW_011516552.1	1000001	2000000	1245
NW_011516552.1	2000001	3000000	884
NW_011516552.1	3000001	4000000	545
NW_011516552.1	4000001	5000000	974
NW_011516552.1	5000001	6000000	534
NW_011516552.1	6000001	7000000	584
NW_011516552.1	7000001	8000000	807
NW_011516552.1	8000001	9000000	669
NW_011516552.1	9000001	10000000	864
NW_011516552.1	10000001	11000000	1172
NW_011516552.1	11000001	12000000	832
NW_011516552.1	12000001	12363173	300
NW_011516558.1	1	1000000	569
NW_011516558.1	1000001	2000000	488
NW_011516558.1	2000001	3000000	790
NW_011516558.1	3000001	4000000	543
NW_011516558.1	4000001	5000000	616
NW_011516558.1	5000001	6000000	589
NW_011516558.1	6000001	7000000	705
NW_011516558.1	7000001	8000000	959
NW_011516558.1	8000001	9000000	807
NW_011516558.1	9000001	10000000	628
NW_011516558.1	10000001	11000000	686
NW_011516558.1	11000001	12000000	550
NW_011516558.1	12000001	12012154	1
NW_011516700.1	1	1000000	533
NW_011516700.1	1000001	2000000	775
NW_011516700.1	2000001	3000000	846
NW_011516700.1	3000001	4000000	613
NW_011516700.1	4000001	5000000	464
NW_011516700.1	5000001	6000000	522
NW_011516700.1	6000001	7000000	671
NW_011516700.1	7000001	8000000	494
NW_011516700.1	8000001	9000000	334
NW_011516700.1	9000001	10000000	507
NW_011516700.1	10000001	11000000	286
NW_011516700.1	11000001	12000000	370
NW_011516700.1	12000001	13000000	371
NW_011516700.1	13000001	13906696	543
NW_011517098.1	1	1000000	1460
NW_011517098.1	1000001	2000000	918
NW_011517098.1	2000001	3000000	529
NW_011517098.1	3000001	4000000	713
NW_011517098.1	4000001	5000000	1053
NW_011517098.1	5000001	6000000	1399
NW_011517098.1	6000001	7000000	1290
NW_011517098.1	7000001	8000000	851
NW_011517098.1	8000001	9000000	1035
NW_011517098.1	9000001	10000000	459
NW_011517098.1	10000001	11000000	513
NW_011517098.1	11000001	12000000	532
NW_011517098.1	12000001	13000000	382
NW_011517098.1	13000001	14000000	345
NW_011517098.1	14000001	14296351	133
NW_011517503.1	1	1000000	657
NW_011517503.1	1000001	2000000	462
NW_011517503.1	2000001	3000000	604
NW_011517503.1	3000001	4000000	590
NW_011517503.1	4000001	5000000	880
NW_011517503.1	5000001	6000000	1254
NW_011517503.1	6000001	7000000	1446
NW_011517503.1	7000001	8000000	1467
NW_011517503.1	8000001	9000000	1294
NW_011517503.1	9000001	10000000	1292
NW_011517503.1	10000001	11000000	810
NW_011517503.1	11000001	11336851	218
NW_011517687.1	1	1000000	485
NW_011517687.1	1000001	2000000	371
NW_011517687.1	2000001	3000000	329
NW_011517687.1	3000001	4000000	410
NW_011517687.1	4000001	5000000	395
NW_011517687.1	5000001	6000000	680
NW_011517687.1	6000001	7000000	666
NW_011517687.1	7000001	8000000	577
NW_011517687.1	8000001	9000000	908
NW_011517687.1	9000001	10000000	1197
NW_011517687.1	10000001	11000000	1345
NW_011517687.1	11000001	12000000	1064
NW_011517687.1	12000001	12730356	1077
NW_011517737.1	1	1000000	860
NW_011517737.1	1000001	2000000	605
NW_011517737.1	2000001	3000000	586
NW_011517737.1	3000001	4000000	702
NW_011517737.1	4000001	5000000	1003
NW_011517737.1	5000001	6000000	881
NW_011517737.1	6000001	7000000	1577
NW_011517737.1	7000001	8000000	960
NW_011517737.1	8000001	9000000	1177
NW_011517737.1	9000001	10000000	1129
NW_011517737.1	10000001	11000000	1346
NW_011517737.1	11000001	11182204	195
NW_011517767.1	1	1000000	1049
NW_011517767.1	1000001	2000000	804
NW_011517767.1	2000001	3000000	1041
NW_011517767.1	3000001	4000000	1446
NW_011517767.1	4000001	5000000	1198
NW_011517767.1	5000001	6000000	599
NW_011517767.1	6000001	7000000	310
NW_011517767.1	7000001	8000000	396
NW_011517767.1	8000001	9000000	692
NW_011517767.1	9000001	10000000	553
NW_011517767.1	10000001	11000000	583
NW_011517767.1	11000001	12000000	652
NW_011517767.1	12000001	13000000	635
NW_011517767.1	13000001	14000000	897
NW_011517767.1	14000001	14478951	493
NW_011517816.1	1	1000000	801
NW_011517816.1	1000001	2000000	733
NW_011517816.1	2000001	3000000	482
NW_011517816.1	3000001	4000000	347
NW_011517816.1	4000001	5000000	443
NW_011517816.1	5000001	6000000	712
NW_011517816.1	6000001	7000000	466
NW_011517816.1	7000001	8000000	951
NW_011517816.1	8000001	9000000	570
NW_011517816.1	9000001	10000000	470
NW_011517816.1	10000001	11000000	656
NW_011517816.1	11000001	12000000	951
NW_011517816.1	12000001	13000000	1255
NW_011517816.1	13000001	14000000	759
NW_011517816.1	14000001	15000000	917
NW_011517816.1	15000001	16000000	550
NW_011517816.1	16000001	16791372	630
NW_011517956.1	1	1000000	1007
NW_011517956.1	1000001	2000000	504
NW_011517956.1	2000001	3000000	673
NW_011517956.1	3000001	4000000	435
NW_011517956.1	4000001	5000000	348
NW_011517956.1	5000001	6000000	481
NW_011517956.1	6000001	7000000	676
NW_011517956.1	7000001	8000000	452
NW_011517956.1	8000001	9000000	518
NW_011517956.1	9000001	10000000	444
NW_011517956.1	10000001	11000000	987
NW_011517956.1	11000001	12000000	1092
NW_011517956.1	12000001	12118209	135
NW_011517961.1	1	1000000	740
NW_011517961.1	1000001	2000000	836
NW_011517961.1	2000001	3000000	965
NW_011517961.1	3000001	4000000	976
NW_011517961.1	4000001	5000000	1032
NW_011517961.1	5000001	6000000	864
NW_011517961.1	6000001	7000000	619
NW_011517961.1	7000001	8000000	533
NW_011517961.1	8000001	9000000	598
NW_011517961.1	9000001	10000000	642
NW_011517961.1	10000001	11000000	781
NW_011517961.1	11000001	12000000	967
NW_011517961.1	12000001	13000000	721
NW_011517961.1	13000001	14000000	646
NW_011517961.1	14000001	15000000	589
NW_011517961.1	15000001	16000000	351
NW_011517961.1	16000001	17000000	682
NW_011517961.1	17000001	18000000	459
NW_011517961.1	18000001	19000000	1037
NW_011517961.1	19000001	20000000	820
NW_011517961.1	20000001	21000000	870
NW_011517961.1	21000001	22000000	559
NW_011517961.1	22000001	23000000	406
NW_011517961.1	23000001	24000000	439
NW_011517961.1	24000001	25000000	581
NW_011517961.1	25000001	26000000	364
NW_011517961.1	26000001	27000000	235
NW_011517961.1	27000001	28000000	178
NW_011517961.1	28000001	28787257	295
NW_011544898.1	1	1000000	463
NW_011544898.1	1000001	2000000	394
NW_011544898.1	2000001	3000000	584
NW_011544898.1	3000001	4000000	1282
NW_011544898.1	4000001	5000000	830
NW_011544898.1	5000001	6000000	765
NW_011544898.1	6000001	7000000	1190
NW_011544898.1	7000001	8000000	1121
NW_011544898.1	8000001	9000000	970
NW_011544898.1	9000001	10000000	952
NW_011544898.1	10000001	11000000	837
NW_011544898.1	11000001	12000000	676
NW_011544898.1	12000001	12707973	915
NW_011544900.1	1	1000000	1091
NW_011544900.1	1000001	2000000	711
NW_011544900.1	2000001	3000000	792
NW_011544900.1	3000001	4000000	1134
NW_011544900.1	4000001	5000000	805
NW_011544900.1	5000001	6000000	1035
NW_011544900.1	6000001	7000000	1282
NW_011544900.1	7000001	8000000	568
NW_011544900.1	8000001	9000000	828
NW_011544900.1	9000001	10000000	1131
NW_011544900.1	10000001	11000000	776
NW_011544900.1	11000001	12000000	597
NW_011544900.1	12000001	13000000	874
NW_011544900.1	13000001	14000000	790
NW_011544900.1	14000001	15000000	1047
NW_011544900.1	15000001	16000000	1182
NW_011544900.1	16000001	17000000	1189
NW_011544900.1	17000001	17290738	180
NW_011544907.1	1	1000000	1198
NW_011544907.1	1000001	2000000	888
NW_011544907.1	2000001	3000000	861
NW_011544907.1	3000001	4000000	698
NW_011544907.1	4000001	5000000	1025
NW_011544907.1	5000001	6000000	606
NW_011544907.1	6000001	7000000	673
NW_011544907.1	7000001	8000000	565
NW_011544907.1	8000001	9000000	758
NW_011544907.1	9000001	10000000	821
NW_011544907.1	10000001	11000000	656
NW_011544907.1	11000001	12000000	486
NW_011544907.1	12000001	13000000	728
NW_011544907.1	13000001	14000000	1185
NW_011544907.1	14000001	15000000	1010
NW_011544907.1	15000001	16000000	1147
NW_011544907.1	16000001	16283089	351
NW_011544909.1	1	1000000	1125
NW_011544909.1	1000001	2000000	1052
NW_011544909.1	2000001	3000000	834
NW_011544909.1	3000001	4000000	1065
NW_011544909.1	4000001	5000000	1039
NW_011544909.1	5000001	6000000	871
NW_011544909.1	6000001	7000000	973
NW_011544909.1	7000001	8000000	991
NW_011544909.1	8000001	9000000	907
NW_011544909.1	9000001	10000000	1231
NW_011544909.1	10000001	11000000	1595
NW_011544909.1	11000001	12000000	1038
NW_011544909.1	12000001	13000000	606
NW_011544909.1	13000001	14000000	674
NW_011544909.1	14000001	15000000	1129
NW_011544909.1	15000001	16000000	1014
NW_011544909.1	16000001	17000000	830
NW_011544909.1	17000001	18000000	487
NW_011544909.1	18000001	19000000	394
NW_011544909.1	19000001	19304888	72
NW_011544910.1	1	1000000	1459
NW_011544910.1	1000001	2000000	1631
NW_011544910.1	2000001	3000000	1276
NW_011544910.1	3000001	4000000	902
NW_011544910.1	4000001	5000000	869
NW_011544910.1	5000001	6000000	802
NW_011544910.1	6000001	7000000	1256
NW_011544910.1	7000001	8000000	1546
NW_011544910.1	8000001	9000000	1290
NW_011544910.1	9000001	10000000	1415
NW_011544910.1	10000001	11000000	638
NW_011544910.1	11000001	12000000	596
NW_011544910.1	12000001	13000000	633
NW_011544910.1	13000001	14000000	622
NW_011544910.1	14000001	14170270	130
NW_011544912.1	1	1000000	603
NW_011544912.1	1000001	2000000	763
NW_011544912.1	2000001	3000000	473
NW_011544912.1	3000001	4000000	260
NW_011544912.1	4000001	5000000	463
NW_011544912.1	5000001	6000000	873
NW_011544912.1	6000001	7000000	1124
NW_011544912.1	7000001	8000000	1125
NW_011544912.1	8000001	9000000	1063
NW_011544912.1	9000001	10000000	1183
NW_011544912.1	10000001	11000000	1264
NW_011544912.1	11000001	12000000	1016
NW_011544912.1	12000001	13000000	1451
NW_011544912.1	13000001	14000000	1603
NW_011544912.1	14000001	14371021	885
