# Supplementary material for: Development of Genomic Resources and Identification of Genetic Diversity and Genetic Structure of the Domestic Bactrian Camel in China by RAD Sequencing
Source: Front Genet. 2020 Jul 30;11:797. doi: 10.3389/fgene.2020.00797 (PMC7406665; doi:10.3389/fgene.2020.00797)
Supplement: Supplementary file 7 [file Table_3.XLSX]

## Sheet: S3 Table
chr	loc_cout	total_len	mean
NW_011512859.1	17670	20201477	1143.26
NW_011511562.1	909	1285324	1414
NW_011517144.1	1535	1594296	1038.63
NW_011516268.1	10509	14495001	1379.29
NW_011515853.1	4926	3275656	664.97
NW_011515227.1	1625	1171128	720.69
NW_011513546.1	7914	11997194	1515.95
NW_011514986.1	4330	8268498	1909.58
NW_011514627.1	784	1775856	2265.12
NW_011514982.1	12900	12671893	982.32
NW_011516739.1	5441	2422479	445.23
NW_011517961.1	18785	28782580	1532.21
NW_011515408.1	10032	15494465	1544.5
NW_011512613.1	1408	2996320	2128.07
NW_011510998.1	284	1362782	4798.53
NW_011515779.1	5691	6915729	1215.2
NW_011515627.1	11480	11268089	981.54
NW_011512250.1	5603	2618087	467.27
NW_011544906.1	1084	3661978	3378.21
NW_011514132.1	8864	5712147	644.42
NW_011513512.1	2204	1673026	759.09
NW_011510929.1	3246	2634389	811.58
NW_011514851.1	3761	4170741	1108.94
NW_011510457.1	2975	4713870	1584.49
NW_011515235.1	2112	2586773	1224.8
NW_011512871.1	7663	6982364	911.18
NW_011516737.1	1790	3808955	2127.91
NW_011510425.1	674	2293966	3403.51
NW_011510294.1	1563	2974309	1902.95
NW_011510361.1	2727	1153482	422.99
NW_011509864.1	2035	1551826	762.57
NW_011513397.1	5965	6702805	1123.69
NW_011510931.1	9201	14025962	1524.4
NW_011514911.1	2205	2895423	1313.12
NW_011512519.1	6478	9212830	1422.17
NW_011512001.1	1273	4052298	3183.27
NW_011513705.1	1388	3593659	2589.09
NW_011510761.1	2667	3976964	1491.18
NW_011514977.1	1101	1601937	1454.98
NW_011513135.1	860	2362309	2746.87
NW_011515959.1	1428	2523560	1767.2
NW_011517687.1	9504	12714661	1337.82
NW_011511613.1	983	3650273	3713.4
NW_011516557.1	2938	6263463	2131.88
NW_011516836.1	6345	5454232	859.61
NW_011517737.1	11021	11179590	1014.39
NW_011511653.1	4456	5603628	1257.55
NW_011514137.1	3054	2250102	736.77
NW_011514414.1	718	1452903	2023.54
NW_011509962.1	4208	4431994	1053.23
NW_011516575.1	2566	2010692	783.59
NW_011517530.1	4790	5902632	1232.28
NW_011516684.1	2167	1383087	638.25
NW_011514148.1	357	1065999	2985.99
NW_011512020.1	3315	2637509	795.63
NW_011515599.1	7782	5676258	729.41
NW_011517767.1	11348	14474125	1275.48
NW_011510729.1	7506	7232838	963.61
NW_011511684.1	3097	3624180	1170.22
NW_011516697.1	492	1384792	2814.62
NW_011513243.1	14510	24934321	1718.42
NW_011510104.1	2590	2317728	894.88
NW_011517956.1	7752	12115307	1562.86
NW_011510818.1	2415	1725184	714.36
NW_011544899.1	4507	7252705	1609.21
NW_011512577.1	2535	1733146	683.69
NW_011516702.1	795	1985943	2498.04
NW_011517499.1	8670	9346502	1078.03
NW_011511770.1	1154	1625899	1408.92
NW_011517136.1	191	992437	5196.01
NW_011517538.1	3526	4318819	1224.85
NW_011516901.1	4168	3788463	908.94
NW_011511989.1	794	1903903	2397.86
NW_011544911.1	1756	6893777	3925.84
NW_011513285.1	3437	5209375	1515.68
NW_011511611.1	7498	10772304	1436.69
NW_011514248.1	3078	4168471	1354.28
NW_011544907.1	13656	16277194	1191.94
NW_011512525.1	2611	4851466	1858.09
NW_011510549.1	4913	2951277	600.71
NW_011517692.1	4641	5433901	1170.85
NW_011515411.1	3961	3926026	991.17
NW_011511553.1	7417	12169022	1640.69
NW_011511773.1	9903	13321073	1345.16
NW_011515168.1	2716	1975956	727.52
NW_011515632.1	8271	10657959	1288.59
NW_011511605.1	18501	24672311	1333.57
NW_011515675.1	4025	5410885	1344.32
NW_011510719.1	6943	8980079	1293.4
NW_011512853.1	4354	5290988	1215.2
NW_011544904.1	7941	8681912	1093.3
NW_011514997.1	3354	1928230	574.9
NW_011517570.1	673	2496841	3710.02
NW_011510266.1	1310	1487998	1135.88
NW_011513121.1	7651	11963489	1563.65
NW_011510356.1	1563	1193138	763.36
NW_011514134.1	5066	6117068	1207.47
NW_011511988.1	4354	4614377	1059.8
NW_011511555.1	2704	5548845	2052.09
NW_011515311.1	4097	4173478	1018.67
NW_011512416.1	1318	1350042	1024.31
NW_011517963.1	3835	5992488	1562.58
NW_011514126.1	5164	3953573	765.6
NW_011544898.1	10979	12705792	1157.28
NW_011512590.1	2507	4319944	1723.15
NW_011515975.1	1768	1134181	641.51
NW_011515158.1	9279	8953960	964.97
NW_011511612.1	2014	1827935	907.61
NW_011511995.1	1263	1081172	856.03
NW_011514272.1	10050	14872073	1479.81
NW_011514978.1	3183	2931303	920.92
NW_011515580.1	3052	7161670	2346.55
NW_011511506.1	3111	4228691	1359.27
NW_011515153.1	6235	6255248	1003.25
NW_011517549.1	2288	2479043	1083.5
NW_011514566.1	3140	3330560	1060.69
NW_011517149.1	1182	3646099	3084.69
NW_011515960.1	4238	3834641	904.82
NW_011512632.1	2762	2196835	795.38
NW_011516706.1	2159	1437874	665.99
NW_011511292.1	570	1192697	2092.45
NW_011510927.1	2036	3138721	1541.61
NW_011517309.1	6891	9524594	1382.18
NW_011515601.1	10354	10904355	1053.15
NW_011515966.1	1118	1432106	1280.95
NW_011513709.1	533	1105202	2073.55
NW_011510793.1	678	1447117	2134.39
NW_011515641.1	1985	2405992	1212.09
NW_011516269.1	39488	46522421	1178.14
NW_011513077.1	3327	6629481	1992.63
NW_011516730.1	2620	2639540	1007.46
NW_011513053.1	2533	2686354	1060.54
NW_011514983.1	4323	7628277	1764.58
NW_011515636.1	22736	18307286	805.21
NW_011516773.1	2752	5285122	1920.47
NW_011515430.1	4736	8120015	1714.53
NW_011516006.1	5417	8156796	1505.78
NW_011513508.1	7486	8829333	1179.45
NW_011512462.1	945	1195421	1265
NW_011509970.1	4575	4428764	968.04
NW_011515567.1	10355	11697711	1129.67
NW_011511600.1	7219	6704949	928.79
NW_011544908.1	8834	8803667	996.57
NW_011544912.1	14149	14367869	1015.47
NW_011511566.1	1688	1775029	1051.56
NW_011511173.1	1901	1317650	693.14
NW_011513955.1	1119	1081122	966.15
NW_011515224.1	15233	15080997	990.02
NW_011516725.1	1994	1889943	947.81
NW_011511114.1	4825	5339060	1106.54
NW_011510930.1	2140	1665576	778.31
NW_011514128.1	2114	3142219	1486.39
NW_011515163.1	244	1322709	5420.94
NW_011516693.1	7717	8089909	1048.32
NW_011511147.1	18687	20420561	1092.77
NW_011509917.1	2817	3558806	1263.33
NW_011514557.1	2921	6476465	2217.21
NW_011511545.1	1825	1088921	596.67
NW_011514224.1	589	1866726	3169.31
NW_011515621.1	1410	1815519	1287.6
NW_011511987.1	1301	2226825	1711.63
NW_011513264.1	2993	2336520	780.66
NW_011510360.1	7893	8260852	1046.6
NW_011513270.1	17887	17672306	988
NW_011510363.1	2061	1555858	754.9
NW_011516410.1	6461	6952418	1076.06
NW_011515754.1	539	1700986	3155.82
NW_011515017.1	2344	4716476	2012.15
NW_011544903.1	7665	8317403	1085.11
NW_011510551.1	2315	4026008	1739.1
NW_011510533.1	4784	4144980	866.43
NW_011509973.1	2270	2706113	1192.12
NW_011514259.1	1531	1428860	933.29
NW_011516731.1	3621	2166373	598.28
NW_011514563.1	6826	5191410	760.53
NW_011514852.1	1117	1043402	934.11
NW_011514637.1	15036	16160423	1074.78
NW_011512198.1	2046	1893492	925.46
NW_011544900.1	16012	17289784	1079.8
NW_011515270.1	2426	3026973	1247.72
NW_011514979.1	2208	2286423	1035.52
NW_011510175.1	3861	5676189	1470.13
NW_011516734.1	435	1190227	2736.15
NW_011512529.1	463	1358307	2933.71
NW_011515164.1	1836	1640479	893.51
NW_011511623.1	6790	8258644	1216.3
NW_011510342.1	9829	9816420	998.72
NW_011510263.1	1281	2262301	1766.04
NW_011511992.1	1206	1287468	1067.55
NW_011509865.1	3604	3955819	1097.62
NW_011513475.1	1136	1705666	1501.47
NW_011517098.1	11612	14291183	1230.73
NW_011544901.1	2279	2399123	1052.71
NW_011511619.1	4007	3344967	834.78
NW_011512597.1	14303	19602662	1370.53
NW_011516553.1	2358	3749562	1590.15
NW_011512850.1	6042	10970056	1815.63
NW_011513299.1	10122	16455595	1625.73
NW_011512008.1	1071	3316725	3096.85
NW_011511614.1	4576	6735799	1471.98
NW_011517677.1	6397	6360169	994.24
NW_011516735.1	828	1392650	1681.94
NW_011511766.1	2994	4206391	1404.94
NW_011513978.1	2223	1716248	772.04
NW_011516738.1	1682	3661965	2177.15
NW_011515635.1	2405	1766657	734.58
NW_011513418.1	791	1943992	2457.64
NW_011544909.1	17927	19256021	1074.14
NW_011516558.1	7931	11997683	1512.76
NW_011512174.1	759	1083005	1426.88
NW_011513934.1	6421	5205742	810.74
NW_011511616.1	2691	3005254	1116.78
NW_011515729.1	1643	2025658	1232.9
NW_011510733.1	2691	2612891	970.97
NW_011544905.1	8776	8922628	1016.71
NW_011516700.1	7329	13894889	1895.88
NW_011511853.1	1687	1388025	822.78
NW_011514988.1	1888	3467456	1836.58
NW_011516475.1	2028	3826277	1886.72
NW_011513413.1	2252	1943507	863.01
NW_011512878.1	3642	4712825	1294.02
NW_011514468.1	8362	10229225	1223.3
NW_011510721.1	1547	3489069	2255.38
NW_011510435.1	1103	1864251	1690.16
NW_011514758.1	12708	11614242	913.93
NW_011513030.1	1666	2505654	1503.99
NW_011514256.1	7384	6150708	832.98
NW_011511602.1	1214	2761201	2274.47
NW_011510995.1	2590	7437141	2871.48
NW_011516271.1	3739	4141680	1107.7
NW_011516746.1	6489	8210774	1265.34
NW_011513506.1	854	3677342	4306.02
NW_011513716.1	8330	6811540	817.71
NW_011514985.1	11952	18743453	1568.23
NW_011516759.1	4821	4428110	918.5
NW_011517682.1	1733	1706906	984.94
NW_011511680.1	12314	14273688	1159.14
NW_011511620.1	4916	5872900	1194.65
NW_011517542.1	1586	1194494	753.15
NW_011516552.1	10886	12360756	1135.47
NW_011512521.1	6974	7539793	1081.13
NW_011516578.1	5775	6379722	1104.71
NW_011514127.1	1730	2631807	1521.28
NW_011510161.1	1026	1245988	1214.41
NW_011514130.1	18108	17697147	977.31
NW_011514020.1	1998	4275811	2140.05
NW_011517816.1	11693	16781282	1435.16
NW_011511373.1	1142	1257481	1101.12
NW_011511137.1	2200	2216484	1007.49
NW_011517118.1	1307	1198224	916.77
NW_011513939.1	1999	3102310	1551.93
NW_011514683.1	9946	11304735	1136.61
NW_011515267.1	1925	2490604	1293.82
NW_011517679.1	1683	1490981	885.91
NW_011513697.1	1484	2292786	1545
NW_011513968.1	1775	1743494	982.25
NW_011516690.1	3698	4916499	1329.5
NW_011513412.1	1447	3138384	2168.89
NW_011517503.1	10974	11328623	1032.31
NW_011516696.1	5998	8726414	1454.89
NW_011513524.1	13202	11925406	903.3
NW_011509967.1	5198	4390523	844.66
NW_011512512.1	4699	3295723	701.37
NW_011514844.1	8936	10865378	1215.91
NW_011544910.1	15065	14164010	940.19
NW_011544902.1	4796	5512412	1149.38
NW_011512444.1	10392	10664387	1026.21
NW_011516685.1	1883	2483433	1318.87
NW_011515021.1	2740	4465405	1629.71
NW_011513750.1	10125	12701274	1254.45
NW_011513761.1	1915	2393001	1249.61
NW_011511150.1	15387	15553528	1010.82
NW_011514262.1	11823	17720821	1498.84
NW_011516265.1	27609	32053799	1160.99
NW_011515847.1	1290	3671653	2846.24
NW_011513414.1	1284	2601151	2025.82
NW_011512322.1	2887	4144148	1435.45
NW_011513519.1	4114	3667276	891.41
NW_011516705.1	1716	2319987	1351.97
NW_011512405.1	1827	2278138	1246.93
NW_011510364.1	9192	7183180	781.46
NW_011511990.1	3488	7059656	2023.98
NW_011515962.1	240	1208202	5034.18
NW_011512517.1	2250	3050290	1355.68
NW_011512834.1	2942	3989557	1356.07
NW_011511427.1	867	2297218	2649.62
NW_011511552.1	13389	13865374	1035.58
NW_011513933.1	9243	11046543	1195.13
NW_011516551.1	665	1258379	1892.3
NW_011516296.1	1408	1777777	1262.63
NW_011515851.1	2939	2469439	840.23
NW_011515625.1	4498	7592439	1687.96
NW_011511178.1	4782	6379799	1334.13
NW_011516528.1	6796	12066967	1775.6
NW_011510741.1	1794	1242607	692.65
NW_011514434.1	3967	3382815	852.74
NW_011515813.1	769	1860245	2419.04
NW_011512010.1	3669	1535991	418.64
NW_011513511.1	1776	1690239	951.71
NW_011512127.1	9203	6507633	707.12
NW_011516563.1	1855	1408711	759.41
NW_011513948.1	2445	4098028	1676.09
NW_011511610.1	6209	7593999	1223.06
NW_011514270.1	3552	3682490	1036.74
NW_011517196.1	7180	7371034	1026.61
NW_011516698.1	4249	3442436	810.18
NW_011512356.1	1872	1878236	1003.33
NW_011512518.1	968	2756861	2848
NW_011517189.1	3257	1693683	520.01
NW_011510373.1	2890	3714813	1285.4
NW_011511551.1	2831	2638760	932.09
NW_011511274.1	4118	5430035	1318.61
NW_011517548.1	1783	1298969	728.53
NW_011512866.1	2194	2545673	1160.29
NW_011510978.1	389	1300489	3343.16
NW_011510722.1	1625	2078459	1279.05
NW_011517028.1	5123	3816639	745
NW_011516281.1	3037	2716076	894.33
NW_011511141.1	5477	8739531	1595.68
NW_011516728.1	3911	4767125	1218.9
