# Supplementary material for: Development of Genomic Resources and Identification of Genetic Diversity and Genetic Structure of the Domestic Bactrian Camel in China by RAD Sequencing
Source: Front Genet. 2020 Jul 30;11:797. doi: 10.3389/fgene.2020.00797 (PMC7406665; doi:10.3389/fgene.2020.00797)
Supplement: Supplementary file 10 [file Table_6.XLSX]

## Sheet: Table S17
Table S17. Gene Ontology (GO) classifications of the shared selected genes in Inner Mongolia camel.
GO ID (level1)	GO Term (level1)	GO ID (level2)	GO Term (level2)	number_of_GS_vs_NM_and_QH_vs_NM_and_XJ_vs_NM (All)	qvalue	per	ratio	Genes_of_GS_vs_NM_and_QH_vs_NM_and_XJ_vs_NM
GO:0008150	Biological Process	GO:0048518	positive regulation of biological process	4	0.102208	66.667	0.002	ncbi_105075942(XIAP),ncbi_105077748(AMELX),ncbi_105077771(ARHGAP6),ncbi_105081023(DMD)
GO:0008150	Biological Process	GO:0048519	negative regulation of biological process	3	0.146022	50	0.002	ncbi_105075942(XIAP),ncbi_105077771(ARHGAP6),ncbi_105081023(DMD)
GO:0008150	Biological Process	GO:0022610	biological adhesion	2	0.146839	33.333	0.003	ncbi_105077748(AMELX),ncbi_105077771(ARHGAP6)
GO:0008150	Biological Process	GO:0044699	single-organism process	6	0.258585	100	0.001	ncbi_105075942(XIAP),ncbi_105075944(THOC2),ncbi_105075945(GRIA3),ncbi_105077748(AMELX),ncbi_105077771(ARHGAP6),ncbi_105081023(DMD)
GO:0008150	Biological Process	GO:0050896	response to stimulus	4	0.265453	66.667	0.001	ncbi_105075942(XIAP),ncbi_105075945(GRIA3),ncbi_105077748(AMELX),ncbi_105081023(DMD)
GO:0008150	Biological Process	GO:0050789	regulation of biological process	5	0.287858	83.333	0.001	ncbi_105075942(XIAP),ncbi_105075945(GRIA3),ncbi_105077748(AMELX),ncbi_105077771(ARHGAP6),ncbi_105081023(DMD)
GO:0008150	Biological Process	GO:0071840	cellular component organization or biogenesis	3	0.294035	50	0.001	ncbi_105077748(AMELX),ncbi_105077771(ARHGAP6),ncbi_105081023(DMD)
GO:0008150	Biological Process	GO:0051179	localization	3	0.31826	50	0.001	ncbi_105075944(THOC2),ncbi_105075945(GRIA3),ncbi_105081023(DMD)
GO:0008150	Biological Process	GO:0023052	signaling	3	0.31826	50	0.001	ncbi_105075942(XIAP),ncbi_105075945(GRIA3),ncbi_105081023(DMD)
GO:0008150	Biological Process	GO:0065007	biological regulation	5	0.32074	83.333	0.001	ncbi_105075942(XIAP),ncbi_105075945(GRIA3),ncbi_105077748(AMELX),ncbi_105077771(ARHGAP6),ncbi_105081023(DMD)
GO:0008150	Biological Process	GO:0008152	metabolic process	5	0.360724	83.333	0.001	ncbi_105075942(XIAP),ncbi_105075944(THOC2),ncbi_105077748(AMELX),ncbi_105077771(ARHGAP6),ncbi_105081023(DMD)
GO:0008150	Biological Process	GO:0032502	developmental process	2	0.577353	33.333	0.001	ncbi_105077748(AMELX),ncbi_105081023(DMD)
GO:0008150	Biological Process	GO:0032501	multicellular organismal process	2	0.670705	33.333	0.001	ncbi_105077748(AMELX),ncbi_105081023(DMD)
GO:0008150	Biological Process	GO:0009987	cellular process	5	0.761369	83.333	0.001	ncbi_105075942(XIAP),ncbi_105075945(GRIA3),ncbi_105077748(AMELX),ncbi_105077771(ARHGAP6),ncbi_105081023(DMD)
GO:0003674	Molecular Function	GO:0005198	structural molecule activity	2	0.0477121	33.333	0.01	ncbi_105077748(AMELX),ncbi_105081023(DMD)
GO:0003674	Molecular Function	GO:0098772	molecular function regulator	2	0.0981966	33.333	0.004	ncbi_105075942(XIAP),ncbi_105077771(ARHGAP6)
GO:0003674	Molecular Function	GO:0005215	transporter activity	1	0.428777	16.667	0.002	ncbi_105075945(GRIA3)
GO:0003674	Molecular Function	GO:0004871	signal transducer activity	1	0.534971	16.667	0.001	ncbi_105075945(GRIA3)
GO:0003674	Molecular Function	GO:0060089	molecular transducer activity	1	0.586793	16.667	0.001	ncbi_105075945(GRIA3)
GO:0003674	Molecular Function	GO:0005488	binding	5	0.612153	83.333	0.001	ncbi_105075942(XIAP),ncbi_105077747(LOC105077747),ncbi_105077748(AMELX),ncbi_105077771(ARHGAP6),ncbi_105081023(DMD)
GO:0003674	Molecular Function	GO:0003824	catalytic activity	2	0.751733	33.333	0.001	ncbi_105075942(XIAP),ncbi_105077747(LOC105077747)
GO:0005575	Cellular Component	GO:0044456	synapse part	2	0.0970366	28.571	0.012	ncbi_105075945(GRIA3),ncbi_105081023(DMD)
GO:0005575	Cellular Component	GO:0045202	synapse	2	0.0970366	28.571	0.01	ncbi_105075945(GRIA3),ncbi_105081023(DMD)
GO:0005575	Cellular Component	GO:0044420	extracellular matrix component	1	0.158828	14.286	0.013	ncbi_105077748(AMELX)
GO:0005575	Cellular Component	GO:0043226	organelle	7	0.158828	100	0.001	ncbi_105075942(XIAP),ncbi_105075944(THOC2),ncbi_105075945(GRIA3),ncbi_105077747(LOC105077747),ncbi_105077748(AMELX),ncbi_105077771(ARHGAP6),ncbi_105081023(DMD)
GO:0005575	Cellular Component	GO:0031012	extracellular matrix	1	0.202652	14.286	0.005	ncbi_105077748(AMELX)
GO:0005575	Cellular Component	GO:0044422	organelle part	4	0.215649	57.143	0.001	ncbi_105075944(THOC2),ncbi_105075945(GRIA3),ncbi_105077747(LOC105077747),ncbi_105081023(DMD)
GO:0005575	Cellular Component	GO:0005623	cell	7	0.261783	100	0.001	ncbi_105075942(XIAP),ncbi_105075944(THOC2),ncbi_105075945(GRIA3),ncbi_105077747(LOC105077747),ncbi_105077748(AMELX),ncbi_105077771(ARHGAP6),ncbi_105081023(DMD)
GO:0005575	Cellular Component	GO:0044464	cell part	7	0.261783	100	0.001	ncbi_105075942(XIAP),ncbi_105075944(THOC2),ncbi_105075945(GRIA3),ncbi_105077747(LOC105077747),ncbi_105077748(AMELX),ncbi_105077771(ARHGAP6),ncbi_105081023(DMD)
GO:0005575	Cellular Component	GO:0032991	macromolecular complex	3	0.289437	42.857	0.001	ncbi_105075944(THOC2),ncbi_105075945(GRIA3),ncbi_105081023(DMD)
GO:0005575	Cellular Component	GO:0030054	cell junction	1	0.362551	14.286	0.002	ncbi_105081023(DMD)
GO:0005575	Cellular Component	GO:0016020	membrane	3	0.666075	42.857	0.001	ncbi_105075945(GRIA3),ncbi_105077747(LOC105077747),ncbi_105081023(DMD)
GO:0005575	Cellular Component	GO:0044425	membrane part	2	0.735799	28.571	0.001	ncbi_105075945(GRIA3),ncbi_105081023(DMD)

## Sheet: Table S18
Table S18. Gene Ontology (GO) classifications of the shared selected genes in Qinghai camel.
GO ID (level1)	GO Term (level1)	GO ID (level2)	GO Term (level2)	number_of_QH (All)	qvalue	per	ratio	Genes_of_QH
GO:0008150	Biological Process	GO:0001906	cell killing	1	0.254506	6.25	0.022	ncbi_105075938(SH2D1A)
GO:0008150	Biological Process	GO:0048519	negative regulation of biological process	5	0.272125	31.25	0.003	ncbi_105075940(STAG2),ncbi_105075942(XIAP),ncbi_105079671(GPC3),ncbi_105080390(ANKRD17),ncbi_105081023(DMD)
GO:0008150	Biological Process	GO:0044848	biological phase	1	0.272313	6.25	0.016	ncbi_105075940(STAG2)
GO:0008150	Biological Process	GO:0048518	positive regulation of biological process	5	0.314223	31.25	0.003	ncbi_105075937(TENM1),ncbi_105075938(SH2D1A),ncbi_105075942(XIAP),ncbi_105079671(GPC3),ncbi_105081023(DMD)
GO:0008150	Biological Process	GO:0071840	cellular component organization or biogenesis	7	0.314735	43.75	0.002	ncbi_105061970(COL4A5),ncbi_105061971(COL4A6),ncbi_105075937(TENM1),ncbi_105075940(STAG2),ncbi_105079671(GPC3),ncbi_105079674(HPRT1),ncbi_105081023(DMD)
GO:0008150	Biological Process	GO:0050789	regulation of biological process	12	0.318098	75	0.002	ncbi_105068647(SCML2),ncbi_105075937(TENM1),ncbi_105075938(SH2D1A),ncbi_105075940(STAG2),ncbi_105075942(XIAP),ncbi_105075945(GRIA3),ncbi_105078955(RASGRP3),ncbi_105079671(GPC3),ncbi_105079672(PHF6),ncbi_105079674(HPRT1),ncbi_105080390(ANKRD17),ncbi_105081023(DMD)
GO:0008150	Biological Process	GO:0065007	biological regulation	12	0.362242	75	0.002	ncbi_105068647(SCML2),ncbi_105075937(TENM1),ncbi_105075938(SH2D1A),ncbi_105075940(STAG2),ncbi_105075942(XIAP),ncbi_105075945(GRIA3),ncbi_105078955(RASGRP3),ncbi_105079671(GPC3),ncbi_105079672(PHF6),ncbi_105079674(HPRT1),ncbi_105080390(ANKRD17),ncbi_105081023(DMD)
GO:0008150	Biological Process	GO:0050896	response to stimulus	8	0.441816	50	0.002	ncbi_105061971(COL4A6),ncbi_105075937(TENM1),ncbi_105075938(SH2D1A),ncbi_105075942(XIAP),ncbi_105075945(GRIA3),ncbi_105079671(GPC3),ncbi_105079674(HPRT1),ncbi_105081023(DMD)
GO:0008150	Biological Process	GO:0023052	signaling	6	0.452767	37.5	0.002	ncbi_105075937(TENM1),ncbi_105075938(SH2D1A),ncbi_105075942(XIAP),ncbi_105075945(GRIA3),ncbi_105079671(GPC3),ncbi_105081023(DMD)
GO:0008150	Biological Process	GO:0007610	behavior	1	0.542761	6.25	0.002	ncbi_105079674(HPRT1)
GO:0008150	Biological Process	GO:0008152	metabolic process	11	0.547905	68.75	0.001	ncbi_105068647(SCML2),ncbi_105068659(CDKL5),ncbi_105075937(TENM1),ncbi_105075940(STAG2),ncbi_105075942(XIAP),ncbi_105075944(THOC2),ncbi_105078955(RASGRP3),ncbi_105079671(GPC3),ncbi_105079672(PHF6),ncbi_105079674(HPRT1),ncbi_105081023(DMD)
GO:0008150	Biological Process	GO:0002376	immune system process	2	0.573251	12.5	0.002	ncbi_105075938(SH2D1A),ncbi_105079671(GPC3)
GO:0008150	Biological Process	GO:0040007	growth	1	0.605905	6.25	0.002	ncbi_105079671(GPC3)
GO:0008150	Biological Process	GO:0044699	single-organism process	12	0.684572	75	0.001	ncbi_105061970(COL4A5),ncbi_105061971(COL4A6),ncbi_105075937(TENM1),ncbi_105075938(SH2D1A),ncbi_105075940(STAG2),ncbi_105075942(XIAP),ncbi_105075944(THOC2),ncbi_105075945(GRIA3),ncbi_105079671(GPC3),ncbi_105079674(HPRT1),ncbi_105080390(ANKRD17),ncbi_105081023(DMD)
GO:0008150	Biological Process	GO:0032502	developmental process	4	0.738511	25	0.001	ncbi_105079671(GPC3),ncbi_105079674(HPRT1),ncbi_105080390(ANKRD17),ncbi_105081023(DMD)
GO:0008150	Biological Process	GO:0051179	localization	4	0.753263	25	0.001	ncbi_105075944(THOC2),ncbi_105075945(GRIA3),ncbi_105079671(GPC3),ncbi_105081023(DMD)
GO:0008150	Biological Process	GO:0009987	cellular process	13	0.761027	81.25	0.001	ncbi_105061970(COL4A5),ncbi_105061971(COL4A6),ncbi_105068659(CDKL5),ncbi_105075937(TENM1),ncbi_105075938(SH2D1A),ncbi_105075940(STAG2),ncbi_105075942(XIAP),ncbi_105075945(GRIA3),ncbi_105079671(GPC3),ncbi_105079672(PHF6),ncbi_105079674(HPRT1),ncbi_105080390(ANKRD17),ncbi_105081023(DMD)
GO:0008150	Biological Process	GO:0032501	multicellular organismal process	4	0.83821	25	0.001	ncbi_105075940(STAG2),ncbi_105079671(GPC3),ncbi_105079674(HPRT1),ncbi_105081023(DMD)
GO:0003674	Molecular Function	GO:0098772	molecular function regulator	3	0.125743	25	0.006	ncbi_105075942(XIAP),ncbi_105078955(RASGRP3),ncbi_105079671(GPC3)
GO:0003674	Molecular Function	GO:0005198	structural molecule activity	2	0.131068	16.667	0.01	ncbi_105061971(COL4A6),ncbi_105081023(DMD)
GO:0003674	Molecular Function	GO:0005488	binding	10	0.656928	83.333	0.001	ncbi_105068659(CDKL5),ncbi_105075937(TENM1),ncbi_105075940(STAG2),ncbi_105075942(XIAP),ncbi_105078955(RASGRP3),ncbi_105079671(GPC3),ncbi_105079672(PHF6),ncbi_105079674(HPRT1),ncbi_105080390(ANKRD17),ncbi_105081023(DMD)
GO:0003674	Molecular Function	GO:0005215	transporter activity	1	0.731603	8.333	0.002	ncbi_105075945(GRIA3)
GO:0003674	Molecular Function	GO:0004871	signal transducer activity	1	0.838688	8.333	0.001	ncbi_105075945(GRIA3)
GO:0003674	Molecular Function	GO:0060089	molecular transducer activity	1	0.838688	8.333	0.001	ncbi_105075945(GRIA3)
GO:0003674	Molecular Function	GO:0003824	catalytic activity	3	0.908932	25	0.001	ncbi_105068659(CDKL5),ncbi_105075942(XIAP),ncbi_105079674(HPRT1)
GO:0005575	Cellular Component	GO:0031012	extracellular matrix	3	0.0570733	18.75	0.015	ncbi_105061970(COL4A5),ncbi_105061971(COL4A6),ncbi_105079671(GPC3)
GO:0005575	Cellular Component	GO:0045202	synapse	3	0.0570733	18.75	0.015	ncbi_105061970(COL4A5),ncbi_105075945(GRIA3),ncbi_105081023(DMD)
GO:0005575	Cellular Component	GO:0032991	macromolecular complex	9	0.0713222	56.25	0.003	ncbi_105061970(COL4A5),ncbi_105061971(COL4A6),ncbi_105068647(SCML2),ncbi_105075940(STAG2),ncbi_105075944(THOC2),ncbi_105075945(GRIA3),ncbi_105078955(RASGRP3),ncbi_105079672(PHF6),ncbi_105081023(DMD)
GO:0005575	Cellular Component	GO:0044420	extracellular matrix component	2	0.0713222	12.5	0.026	ncbi_105061970(COL4A5),ncbi_105061971(COL4A6)
GO:0005575	Cellular Component	GO:0044456	synapse part	2	0.161965	12.5	0.012	ncbi_105075945(GRIA3),ncbi_105081023(DMD)
GO:0005575	Cellular Component	GO:0031974	membrane-enclosed lumen	2	0.594178	12.5	0.002	ncbi_105075940(STAG2),ncbi_105079672(PHF6)
GO:0005575	Cellular Component	GO:0005623	cell	13	0.657493	81.25	0.002	ncbi_105068659(CDKL5),ncbi_105075937(TENM1),ncbi_105075938(SH2D1A),ncbi_105075940(STAG2),ncbi_105075942(XIAP),ncbi_105075944(THOC2),ncbi_105075945(GRIA3),ncbi_105078955(RASGRP3),ncbi_105079671(GPC3),ncbi_105079672(PHF6),ncbi_105079674(HPRT1),ncbi_105080390(ANKRD17),ncbi_105081023(DMD)
GO:0005575	Cellular Component	GO:0044464	cell part	13	0.657493	81.25	0.002	ncbi_105068659(CDKL5),ncbi_105075937(TENM1),ncbi_105075938(SH2D1A),ncbi_105075940(STAG2),ncbi_105075942(XIAP),ncbi_105075944(THOC2),ncbi_105075945(GRIA3),ncbi_105078955(RASGRP3),ncbi_105079671(GPC3),ncbi_105079672(PHF6),ncbi_105079674(HPRT1),ncbi_105080390(ANKRD17),ncbi_105081023(DMD)
GO:0005575	Cellular Component	GO:0030054	cell junction	1	0.70345	6.25	0.002	ncbi_105081023(DMD)
GO:0005575	Cellular Component	GO:0044422	organelle part	5	0.70345	31.25	0.001	ncbi_105075940(STAG2),ncbi_105075944(THOC2),ncbi_105075945(GRIA3),ncbi_105079672(PHF6),ncbi_105081023(DMD)
GO:0005575	Cellular Component	GO:0044421	extracellular region part	1	0.743074	6.25	0.001	ncbi_105061970(COL4A5)
GO:0005575	Cellular Component	GO:0005576	extracellular region	1	0.743074	6.25	0.001	ncbi_105061970(COL4A5)
GO:0005575	Cellular Component	GO:0044425	membrane part	4	0.861194	25	0.001	ncbi_105075937(TENM1),ncbi_105075945(GRIA3),ncbi_105079671(GPC3),ncbi_105081023(DMD)
GO:0005575	Cellular Component	GO:0043226	organelle	10	0.864644	62.5	0.001	ncbi_105068659(CDKL5),ncbi_105075940(STAG2),ncbi_105075942(XIAP),ncbi_105075944(THOC2),ncbi_105075945(GRIA3),ncbi_105079671(GPC3),ncbi_105079672(PHF6),ncbi_105079674(HPRT1),ncbi_105080390(ANKRD17),ncbi_105081023(DMD)
GO:0005575	Cellular Component	GO:0016020	membrane	5	0.892201	31.25	0.001	ncbi_105075937(TENM1),ncbi_105075940(STAG2),ncbi_105075945(GRIA3),ncbi_105079671(GPC3),ncbi_105081023(DMD)

## Sheet: Table S19
Table S19. Gene Ontology (GO) classifications of the shared selected genes in Xinjiang camel.
GO ID (level1)	GO Term (level1)	GO ID (level2)	GO Term (level2)	number_of_XJ (All)	qvalue	per	ratio	Genes_of_XJ
GO:0008150	Biological Process	GO:0051179	localization	6	0.566856	37.5	0.002	ncbi_105075944(THOC2),ncbi_105075945(GRIA3),ncbi_105079298(TMEM27),ncbi_105079299(CA5B),ncbi_105079300(AP1S2),ncbi_105079356(LOC105079356)
GO:0008150	Biological Process	GO:0051704	multi-organism process	2	0.60409	12.5	0.002	ncbi_105079297(ACE2),ncbi_105079356(LOC105079356)
GO:0008150	Biological Process	GO:0044699	single-organism process	13	0.60409	81.25	0.001	ncbi_105068638(CTPS2),ncbi_105068641(RBBP7),ncbi_105068655(TXLNG),ncbi_105072922(ORMDL1),ncbi_105072923(PMS1),ncbi_105072929(MFSD6),ncbi_105075942(XIAP),ncbi_105075944(THOC2),ncbi_105075945(GRIA3),ncbi_105079298(TMEM27),ncbi_105079299(CA5B),ncbi_105079301(GRPR),ncbi_105079356(LOC105079356)
GO:0008150	Biological Process	GO:0048519	negative regulation of biological process	3	0.649241	18.75	0.002	ncbi_105068641(RBBP7),ncbi_105072922(ORMDL1),ncbi_105075942(XIAP)
GO:0008150	Biological Process	GO:0008152	metabolic process	11	0.649241	68.75	0.001	ncbi_105068638(CTPS2),ncbi_105068641(RBBP7),ncbi_105072922(ORMDL1),ncbi_105072923(PMS1),ncbi_105075942(XIAP),ncbi_105075944(THOC2),ncbi_105079297(ACE2),ncbi_105079298(TMEM27),ncbi_105079299(CA5B),ncbi_105079304(ZRSR2),ncbi_105079356(LOC105079356)
GO:0008150	Biological Process	GO:0009987	cellular process	14	0.683119	87.5	0.001	ncbi_105068638(CTPS2),ncbi_105068641(RBBP7),ncbi_105068655(TXLNG),ncbi_105072922(ORMDL1),ncbi_105072923(PMS1),ncbi_105072929(MFSD6),ncbi_105075942(XIAP),ncbi_105075945(GRIA3),ncbi_105079297(ACE2),ncbi_105079298(TMEM27),ncbi_105079299(CA5B),ncbi_105079301(GRPR),ncbi_105079304(ZRSR2),ncbi_105079356(LOC105079356)
GO:0008150	Biological Process	GO:0040007	growth	1	0.705762	6.25	0.002	ncbi_105068641(RBBP7)
GO:0008150	Biological Process	GO:0022610	biological adhesion	1	0.802321	6.25	0.001	ncbi_105079297(ACE2)
GO:0008150	Biological Process	GO:0050896	response to stimulus	6	0.818782	37.5	0.001	ncbi_105068641(RBBP7),ncbi_105072923(PMS1),ncbi_105075942(XIAP),ncbi_105075945(GRIA3),ncbi_105079297(ACE2),ncbi_105079301(GRPR)
GO:0008150	Biological Process	GO:0071840	cellular component organization or biogenesis	4	0.827112	25	0.001	ncbi_105068641(RBBP7),ncbi_105079298(TMEM27),ncbi_105079304(ZRSR2),ncbi_105079356(LOC105079356)
GO:0008150	Biological Process	GO:0023052	signaling	4	0.847696	25	0.001	ncbi_105075942(XIAP),ncbi_105075945(GRIA3),ncbi_105079298(TMEM27),ncbi_105079301(GRPR)
GO:0008150	Biological Process	GO:0048518	positive regulation of biological process	2	0.878062	12.5	0.001	ncbi_105075942(XIAP),ncbi_105079298(TMEM27)
GO:0008150	Biological Process	GO:0065007	biological regulation	8	0.94447	50	0.001	ncbi_105068641(RBBP7),ncbi_105068655(TXLNG),ncbi_105072922(ORMDL1),ncbi_105075942(XIAP),ncbi_105075945(GRIA3),ncbi_105079297(ACE2),ncbi_105079298(TMEM27),ncbi_105079301(GRPR)
GO:0008150	Biological Process	GO:0050789	regulation of biological process	7	0.952946	43.75	0.001	ncbi_105068641(RBBP7),ncbi_105068655(TXLNG),ncbi_105072922(ORMDL1),ncbi_105075942(XIAP),ncbi_105075945(GRIA3),ncbi_105079298(TMEM27),ncbi_105079301(GRPR)
GO:0008150	Biological Process	GO:0032501	multicellular organismal process	3	0.960032	18.75	0.001	ncbi_105068641(RBBP7),ncbi_105068655(TXLNG),ncbi_105079297(ACE2)
GO:0003674	Molecular Function	GO:0060089	molecular transducer activity	3	0.449185	21.429	0.002	ncbi_105075945(GRIA3),ncbi_105079297(ACE2),ncbi_105079301(GRPR)
GO:0003674	Molecular Function	GO:0005215	transporter activity	2	0.449185	14.286	0.003	ncbi_105075945(GRIA3),ncbi_105079300(AP1S2)
GO:0003674	Molecular Function	GO:0005198	structural molecule activity	1	0.449185	7.143	0.005	ncbi_105079356(LOC105079356)
GO:0003674	Molecular Function	GO:0004871	signal transducer activity	2	0.60658	14.286	0.002	ncbi_105075945(GRIA3),ncbi_105079301(GRPR)
GO:0003674	Molecular Function	GO:0098772	molecular function regulator	1	0.664572	7.143	0.002	ncbi_105075942(XIAP)
GO:0003674	Molecular Function	GO:0003824	catalytic activity	5	0.784263	35.714	0.001	ncbi_105068638(CTPS2),ncbi_105075942(XIAP),ncbi_105079297(ACE2),ncbi_105079298(TMEM27),ncbi_105079299(CA5B)
GO:0003674	Molecular Function	GO:0005488	binding	10	0.897497	71.429	0.001	ncbi_105068637(S100G),ncbi_105068638(CTPS2),ncbi_105068641(RBBP7),ncbi_105068655(TXLNG),ncbi_105072923(PMS1),ncbi_105075942(XIAP),ncbi_105079297(ACE2),ncbi_105079299(CA5B),ncbi_105079304(ZRSR2),ncbi_105079356(LOC105079356)
GO:0005575	Cellular Component	GO:0044422	organelle part	9	0.514386	50	0.003	ncbi_105068641(RBBP7),ncbi_105068655(TXLNG),ncbi_105072922(ORMDL1),ncbi_105075944(THOC2),ncbi_105075945(GRIA3),ncbi_105079299(CA5B),ncbi_105079300(AP1S2),ncbi_105079304(ZRSR2),ncbi_105079356(LOC105079356)
GO:0005575	Cellular Component	GO:0043226	organelle	15	0.514386	83.333	0.002	ncbi_105068638(CTPS2),ncbi_105068640(SYAP1),ncbi_105068641(RBBP7),ncbi_105068655(TXLNG),ncbi_105072922(ORMDL1),ncbi_105072927(HIBCH),ncbi_105075942(XIAP),ncbi_105075944(THOC2),ncbi_105075945(GRIA3),ncbi_105079297(ACE2),ncbi_105079298(TMEM27),ncbi_105079299(CA5B),ncbi_105079300(AP1S2),ncbi_105079304(ZRSR2),ncbi_105079356(LOC105079356)
GO:0005575	Cellular Component	GO:0032991	macromolecular complex	6	0.583909	33.333	0.002	ncbi_105068641(RBBP7),ncbi_105075944(THOC2),ncbi_105075945(GRIA3),ncbi_105079300(AP1S2),ncbi_105079304(ZRSR2),ncbi_105079356(LOC105079356)
GO:0005575	Cellular Component	GO:0044456	synapse part	1	0.583909	5.556	0.006	ncbi_105075945(GRIA3)
GO:0005575	Cellular Component	GO:0045202	synapse	1	0.612593	5.556	0.005	ncbi_105075945(GRIA3)
GO:0005575	Cellular Component	GO:0016020	membrane	9	0.612593	50	0.002	ncbi_105068637(S100G),ncbi_105068655(TXLNG),ncbi_105072922(ORMDL1),ncbi_105072929(MFSD6),ncbi_105075945(GRIA3),ncbi_105079297(ACE2),ncbi_105079298(TMEM27),ncbi_105079300(AP1S2),ncbi_105079301(GRPR)
GO:0005575	Cellular Component	GO:0044425	membrane part	7	0.612593	38.889	0.002	ncbi_105072922(ORMDL1),ncbi_105072929(MFSD6),ncbi_105075945(GRIA3),ncbi_105079297(ACE2),ncbi_105079298(TMEM27),ncbi_105079300(AP1S2),ncbi_105079301(GRPR)
GO:0005575	Cellular Component	GO:0030054	cell junction	1	0.757568	5.556	0.002	ncbi_105079356(LOC105079356)
GO:0005575	Cellular Component	GO:0005623	cell	14	0.757568	77.778	0.002	ncbi_105068637(S100G),ncbi_105068638(CTPS2),ncbi_105068640(SYAP1),ncbi_105068641(RBBP7),ncbi_105072922(ORMDL1),ncbi_105072927(HIBCH),ncbi_105075942(XIAP),ncbi_105075944(THOC2),ncbi_105075945(GRIA3),ncbi_105079297(ACE2),ncbi_105079298(TMEM27),ncbi_105079299(CA5B),ncbi_105079304(ZRSR2),ncbi_105079356(LOC105079356)
GO:0005575	Cellular Component	GO:0044464	cell part	14	0.757568	77.778	0.002	ncbi_105068637(S100G),ncbi_105068638(CTPS2),ncbi_105068640(SYAP1),ncbi_105068641(RBBP7),ncbi_105072922(ORMDL1),ncbi_105072927(HIBCH),ncbi_105075942(XIAP),ncbi_105075944(THOC2),ncbi_105075945(GRIA3),ncbi_105079297(ACE2),ncbi_105079298(TMEM27),ncbi_105079299(CA5B),ncbi_105079304(ZRSR2),ncbi_105079356(LOC105079356)
GO:0005575	Cellular Component	GO:0044421	extracellular region part	1	0.808808	5.556	0.001	ncbi_105079297(ACE2)
GO:0005575	Cellular Component	GO:0005576	extracellular region	1	0.808808	5.556	0.001	ncbi_105079297(ACE2)
GO:0005575	Cellular Component	GO:0031974	membrane-enclosed lumen	1	0.879962	5.556	0.001	ncbi_105068641(RBBP7)

## Sheet: Table S20
Table S20. Gene Ontology (GO) classifications of the shared selected genes in Gansu camel.
GO ID (level1)	GO Term (level1)	GO ID (level2)	GO Term (level2)	number_of_GS (All)	qvalue	per	ratio	Genes_of_GS
GO:0008150	Biological Process	GO:0044848	biological phase	4	0.318774	5.556	0.062	ncbi_105069781(PSMC5),ncbi_105075940(STAG2),ncbi_105082123(SKP1),ncbi_105082124(PPP2CA)
GO:0008150	Biological Process	GO:0071840	cellular component organization or biogenesis	30	0.538705	41.667	0.009	ncbi_105061970(COL4A5),ncbi_105061971(COL4A6),ncbi_105062968(RPL39),ncbi_105062990(SLC25A5),ncbi_105066221(PDS5B),ncbi_105069781(PSMC5),ncbi_105069783(SMARCD2),ncbi_105069784(FTSJ3),ncbi_105075848(LOC105075848),ncbi_105075852(BHLHB9),ncbi_105075940(STAG2),ncbi_105077746(MID1),ncbi_105077748(AMELX),ncbi_105077771(ARHGAP6),ncbi_105077954(CADM2),ncbi_105079084(AMOT),ncbi_105079360(RP2),ncbi_10507936…
GO:0008150	Biological Process	GO:0048518	positive regulation of biological process	18	0.538705	25	0.009	ncbi_105062989(NKAP),ncbi_105069778(CD79B),ncbi_105069781(PSMC5),ncbi_105069787(STRADA),ncbi_105075852(BHLHB9),ncbi_105075863(NRK),ncbi_105075942(XIAP),ncbi_105077748(AMELX),ncbi_105077771(ARHGAP6),ncbi_105079084(AMOT),ncbi_105079365(RBM10),ncbi_105082123(SKP1),ncbi_105082124(PPP2CA),ncbi_105082125(CDKL3),ncbi_105082132(SEC24A),ncbi_105083680(CXCR3),ncbi_105083681(OGT),ncbi_105083683(TAF1)
GO:0008150	Biological Process	GO:0051704	multi-organism process	10	0.538705	13.889	0.01	ncbi_105062968(RPL39),ncbi_105069781(PSMC5),ncbi_105069792(LOC105069792),ncbi_105075863(NRK),ncbi_105079368(CDK16),ncbi_105082119(VDAC1),ncbi_105082123(SKP1),ncbi_105083675(CITED1),ncbi_105083676(RPS4X),ncbi_105083683(TAF1)
GO:0008150	Biological Process	GO:0065007	biological regulation	50	0.538705	69.444	0.007	ncbi_105062966(UPF3B),ncbi_105062971(NKRF),ncbi_105062989(NKAP),ncbi_105062990(SLC25A5),ncbi_105066218(STARD13),ncbi_105066220(KL),ncbi_105069778(CD79B),ncbi_105069779(LOC105069779),ncbi_105069781(PSMC5),ncbi_105069783(SMARCD2),ncbi_105069786(CCDC47),ncbi_105069787(STRADA),ncbi_105069792(LOC105069792),ncbi_105069840(LOC105069840),ncbi_105075848(LOC105075848),ncbi_105075852(BHLHB9),ncbi_105075862(…
GO:0008150	Biological Process	GO:0050789	regulation of biological process	47	0.545911	65.278	0.007	ncbi_105062966(UPF3B),ncbi_105062971(NKRF),ncbi_105062989(NKAP),ncbi_105062990(SLC25A5),ncbi_105066218(STARD13),ncbi_105066220(KL),ncbi_105069778(CD79B),ncbi_105069779(LOC105069779),ncbi_105069781(PSMC5),ncbi_105069783(SMARCD2),ncbi_105069786(CCDC47),ncbi_105069787(STRADA),ncbi_105075848(LOC105075848),ncbi_105075852(BHLHB9),ncbi_105075862(IL1RAPL2),ncbi_105075863(NRK),ncbi_105075866(LOC105075866)…
GO:0008150	Biological Process	GO:0009987	cellular process	64	0.545911	88.889	0.007	ncbi_105061970(COL4A5),ncbi_105061971(COL4A6),ncbi_105062966(UPF3B),ncbi_105062968(RPL39),ncbi_105062970(SEPT6),ncbi_105062971(NKRF),ncbi_105062974(SLC25A43),ncbi_105062989(NKAP),ncbi_105062990(SLC25A5),ncbi_105066218(STARD13),ncbi_105066220(KL),ncbi_105066221(PDS5B),ncbi_105069778(CD79B),ncbi_105069779(LOC105069779),ncbi_105069781(PSMC5),ncbi_105069783(SMARCD2),ncbi_105069784(FTSJ3),ncbi_1050697…
GO:0008150	Biological Process	GO:0048511	rhythmic process	2	0.545911	2.778	0.018	ncbi_105082123(SKP1),ncbi_105083681(OGT)
GO:0008150	Biological Process	GO:0044699	single-organism process	58	0.556096	80.556	0.007	ncbi_105061970(COL4A5),ncbi_105061971(COL4A6),ncbi_105062968(RPL39),ncbi_105062970(SEPT6),ncbi_105062974(SLC25A43),ncbi_105062989(NKAP),ncbi_105062990(SLC25A5),ncbi_105066220(KL),ncbi_105066221(PDS5B),ncbi_105069778(CD79B),ncbi_105069779(LOC105069779),ncbi_105069781(PSMC5),ncbi_105069786(CCDC47),ncbi_105069787(STRADA),ncbi_105069791(DCAF7),ncbi_105069792(LOC105069792),ncbi_105069793(LOC105069793)…
GO:0008150	Biological Process	GO:0048519	negative regulation of biological process	14	0.565049	19.444	0.008	ncbi_105062990(SLC25A5),ncbi_105069781(PSMC5),ncbi_105075848(LOC105075848),ncbi_105075852(BHLHB9),ncbi_105075940(STAG2),ncbi_105075942(XIAP),ncbi_105077746(MID1),ncbi_105077771(ARHGAP6),ncbi_105079365(RBM10),ncbi_105082124(PPP2CA),ncbi_105082125(CDKL3),ncbi_105083675(CITED1),ncbi_105083680(CXCR3),ncbi_105083687(NONO)
GO:0008150	Biological Process	GO:0002376	immune system process	9	0.604753	12.5	0.008	ncbi_105062968(RPL39),ncbi_105062989(NKAP),ncbi_105069778(CD79B),ncbi_105069781(PSMC5),ncbi_105069792(LOC105069792),ncbi_105082123(SKP1),ncbi_105082130(SAR1B),ncbi_105083680(CXCR3),ncbi_105083681(OGT)
GO:0008150	Biological Process	GO:0022610	biological adhesion	6	0.604753	8.333	0.008	ncbi_105062989(NKAP),ncbi_105067165(PCDH11X),ncbi_105077748(AMELX),ncbi_105077771(ARHGAP6),ncbi_105077954(CADM2),ncbi_105082124(PPP2CA)
GO:0008150	Biological Process	GO:0040007	growth	4	0.631533	5.556	0.008	ncbi_105069779(LOC105069779),ncbi_105075863(NRK),ncbi_105082124(PPP2CA),ncbi_105082125(CDKL3)
GO:0008150	Biological Process	GO:0051179	localization	22	0.642859	30.556	0.007	ncbi_105062968(RPL39),ncbi_105062974(SLC25A43),ncbi_105062990(SLC25A5),ncbi_105069785(DDX42),ncbi_105069787(STRADA),ncbi_105069793(LOC105069793),ncbi_105072887(CCDC141),ncbi_105075944(THOC2),ncbi_105075945(GRIA3),ncbi_105077746(MID1),ncbi_105079084(AMOT),ncbi_105079359(SLC9A7),ncbi_105079360(RP2),ncbi_105079368(CDK16),ncbi_105081176(IL1RAPL1),ncbi_105082119(VDAC1),ncbi_105082130(SAR1B),ncbi_10508…
GO:0008150	Biological Process	GO:0023052	signaling	22	0.642859	30.556	0.007	ncbi_105066220(KL),ncbi_105069778(CD79B),ncbi_105069779(LOC105069779),ncbi_105069781(PSMC5),ncbi_105069786(CCDC47),ncbi_105069787(STRADA),ncbi_105075862(IL1RAPL2),ncbi_105075863(NRK),ncbi_105075942(XIAP),ncbi_105075945(GRIA3),ncbi_105077746(MID1),ncbi_105079362(RGN),ncbi_105079368(CDK16),ncbi_105082119(VDAC1),ncbi_105082123(SKP1),ncbi_105082124(PPP2CA),ncbi_105082128(JADE2),ncbi_105082255(CAMLG),…
GO:0008150	Biological Process	GO:0008152	metabolic process	46	0.691566	63.889	0.006	ncbi_105062966(UPF3B),ncbi_105062968(RPL39),ncbi_105062971(NKRF),ncbi_105062989(NKAP),ncbi_105066220(KL),ncbi_105069779(LOC105069779),ncbi_105069781(PSMC5),ncbi_105069783(SMARCD2),ncbi_105069784(FTSJ3),ncbi_105069787(STRADA),ncbi_105069792(LOC105069792),ncbi_105069793(LOC105069793),ncbi_105075863(NRK),ncbi_105075866(LOC105075866),ncbi_105075869(ESX1),ncbi_105075940(STAG2),ncbi_105075942(XIAP),ncb…
GO:0008150	Biological Process	GO:0022414	reproductive process	4	0.712363	5.556	0.006	ncbi_105069792(LOC105069792),ncbi_105075863(NRK),ncbi_105079368(CDK16),ncbi_105083675(CITED1)
GO:0008150	Biological Process	GO:0000003	reproduction	4	0.713795	5.556	0.006	ncbi_105069792(LOC105069792),ncbi_105075863(NRK),ncbi_105079368(CDK16),ncbi_105083675(CITED1)
GO:0008150	Biological Process	GO:0032502	developmental process	20	0.721314	27.778	0.006	ncbi_105062989(NKAP),ncbi_105066220(KL),ncbi_105069779(LOC105069779),ncbi_105069791(DCAF7),ncbi_105069792(LOC105069792),ncbi_105072887(CCDC141),ncbi_105075852(BHLHB9),ncbi_105075863(NRK),ncbi_105075869(ESX1),ncbi_105077748(AMELX),ncbi_105077954(CADM2),ncbi_105079084(AMOT),ncbi_105079360(RP2),ncbi_105082119(VDAC1),ncbi_105082124(PPP2CA),ncbi_105082125(CDKL3),ncbi_105083675(CITED1),ncbi_105083680(C…
GO:0008150	Biological Process	GO:0050896	response to stimulus	27	0.799444	37.5	0.006	ncbi_105061971(COL4A6),ncbi_105062968(RPL39),ncbi_105066220(KL),ncbi_105069778(CD79B),ncbi_105069779(LOC105069779),ncbi_105069781(PSMC5),ncbi_105069786(CCDC47),ncbi_105069787(STRADA),ncbi_105075862(IL1RAPL2),ncbi_105075863(NRK),ncbi_105075942(XIAP),ncbi_105075945(GRIA3),ncbi_105077746(MID1),ncbi_105077748(AMELX),ncbi_105079084(AMOT),ncbi_105079362(RGN),ncbi_105079366(UBA1),ncbi_105082119(VDAC1),n…
GO:0008150	Biological Process	GO:0032501	multicellular organismal process	20	0.908294	27.778	0.005	ncbi_105062989(NKAP),ncbi_105069779(LOC105069779),ncbi_105069786(CCDC47),ncbi_105069791(DCAF7),ncbi_105069792(LOC105069792),ncbi_105069840(LOC105069840),ncbi_105072887(CCDC141),ncbi_105075869(ESX1),ncbi_105075940(STAG2),ncbi_105077748(AMELX),ncbi_105077954(CADM2),ncbi_105079084(AMOT),ncbi_105079368(CDK16),ncbi_105082119(VDAC1),ncbi_105082124(PPP2CA),ncbi_105082125(CDKL3),ncbi_105083675(CITED1),nc…
GO:0008150	Biological Process	GO:0007610	behavior	1	0.947285	1.389	0.002	ncbi_105082119(VDAC1)
GO:0008150	Biological Process	GO:0040011	locomotion	2	0.985185	2.778	0.002	ncbi_105072887(CCDC141),ncbi_105079084(AMOT)
GO:0003674	Molecular Function	GO:0005488	binding	62	0.239565	91.176	0.008	ncbi_105062965(RNF113A),ncbi_105062966(UPF3B),ncbi_105062968(RPL39),ncbi_105062970(SEPT6),ncbi_105062971(NKRF),ncbi_105062987(RHOXF1),ncbi_105062989(NKAP),ncbi_105062990(SLC25A5),ncbi_105066218(STARD13),ncbi_105066220(KL),ncbi_105066221(PDS5B),ncbi_105069779(LOC105069779),ncbi_105069781(PSMC5),ncbi_105069783(SMARCD2),ncbi_105069784(FTSJ3),ncbi_105069785(DDX42),ncbi_105069786(CCDC47),ncbi_10506978…
GO:0003674	Molecular Function	GO:0005198	structural molecule activity	4	0.391971	5.882	0.02	ncbi_105061971(COL4A6),ncbi_105062968(RPL39),ncbi_105077748(AMELX),ncbi_105083676(RPS4X)
GO:0003674	Molecular Function	GO:0098772	molecular function regulator	5	0.502653	7.353	0.01	ncbi_105069787(STRADA),ncbi_105075942(XIAP),ncbi_105077771(ARHGAP6),ncbi_105079360(RP2),ncbi_105083681(OGT)
GO:0003674	Molecular Function	GO:0000988	transcription factor activity, protein binding	3	0.579899	4.412	0.01	ncbi_105069781(PSMC5),ncbi_105083675(CITED1),ncbi_105083683(TAF1)
GO:0003674	Molecular Function	GO:0005215	transporter activity	4	0.755956	5.882	0.006	ncbi_105069793(LOC105069793),ncbi_105075945(GRIA3),ncbi_105079359(SLC9A7),ncbi_105082119(VDAC1)
GO:0003674	Molecular Function	GO:0003824	catalytic activity	25	0.755956	36.765	0.006	ncbi_105069781(PSMC5),ncbi_105069784(FTSJ3),ncbi_105069785(DDX42),ncbi_105069787(STRADA),ncbi_105069792(LOC105069792),ncbi_105069840(LOC105069840),ncbi_105075863(NRK),ncbi_105075942(XIAP),ncbi_105077747(LOC105077747),ncbi_105079360(RP2),ncbi_105079362(RGN),ncbi_105079366(UBA1),ncbi_105079368(CDK16),ncbi_105079369(USP11),ncbi_105082123(SKP1),ncbi_105082124(PPP2CA),ncbi_105082125(CDKL3),ncbi_105082…
GO:0003674	Molecular Function	GO:0060089	molecular transducer activity	4	0.999704	5.882	0.003	ncbi_105066220(KL),ncbi_105075945(GRIA3),ncbi_105079084(AMOT),ncbi_105083680(CXCR3)
GO:0003674	Molecular Function	GO:0004871	signal transducer activity	2	0.999704	2.941	0.002	ncbi_105075945(GRIA3),ncbi_105083680(CXCR3)
GO:0005575	Cellular Component	GO:0044422	organelle part	32	0.109643	47.059	0.009	ncbi_105062968(RPL39),ncbi_105062970(SEPT6),ncbi_105062990(SLC25A5),ncbi_105069779(LOC105069779),ncbi_105069781(PSMC5),ncbi_105069783(SMARCD2),ncbi_105069787(STRADA),ncbi_105069791(DCAF7),ncbi_105072887(CCDC141),ncbi_105075940(STAG2),ncbi_105075944(THOC2),ncbi_105075945(GRIA3),ncbi_105077746(MID1),ncbi_105077747(LOC105077747),ncbi_105079084(AMOT),ncbi_105079359(SLC9A7),ncbi_105079360(RP2),ncbi_10…
GO:0005575	Cellular Component	GO:0043226	organelle	57	0.125719	83.824	0.007	ncbi_105062966(UPF3B),ncbi_105062968(RPL39),ncbi_105062970(SEPT6),ncbi_105062974(SLC25A43),ncbi_105062989(NKAP),ncbi_105062990(SLC25A5),ncbi_105069778(CD79B),ncbi_105069779(LOC105069779),ncbi_105069781(PSMC5),ncbi_105069783(SMARCD2),ncbi_105069784(FTSJ3),ncbi_105069785(DDX42),ncbi_105069786(CCDC47),ncbi_105069787(STRADA),ncbi_105069790(LOC105069790),ncbi_105069791(DCAF7),ncbi_105069793(LOC1050697…
GO:0005575	Cellular Component	GO:0044420	extracellular matrix component	3	0.188536	4.412	0.039	ncbi_105061970(COL4A5),ncbi_105061971(COL4A6),ncbi_105077748(AMELX)
GO:0005575	Cellular Component	GO:0009295	nucleoid	2	0.204178	2.941	0.067	ncbi_105062990(SLC25A5),ncbi_105082119(VDAC1)
GO:0005575	Cellular Component	GO:0032991	macromolecular complex	24	0.23159	35.294	0.009	ncbi_105061970(COL4A5),ncbi_105061971(COL4A6),ncbi_105062966(UPF3B),ncbi_105062968(RPL39),ncbi_105062990(SLC25A5),ncbi_105069778(CD79B),ncbi_105069781(PSMC5),ncbi_105069783(SMARCD2),ncbi_105069784(FTSJ3),ncbi_105069791(DCAF7),ncbi_105072888(SESTD1),ncbi_105075940(STAG2),ncbi_105075944(THOC2),ncbi_105075945(GRIA3),ncbi_105079084(AMOT),ncbi_105079366(UBA1),ncbi_105082123(SKP1),ncbi_105082124(PPP2CA…
GO:0005575	Cellular Component	GO:0005623	cell	59	0.30935	86.765	0.007	ncbi_105062966(UPF3B),ncbi_105062968(RPL39),ncbi_105062970(SEPT6),ncbi_105062974(SLC25A43),ncbi_105062989(NKAP),ncbi_105062990(SLC25A5),ncbi_105069778(CD79B),ncbi_105069779(LOC105069779),ncbi_105069781(PSMC5),ncbi_105069783(SMARCD2),ncbi_105069784(FTSJ3),ncbi_105069785(DDX42),ncbi_105069786(CCDC47),ncbi_105069787(STRADA),ncbi_105069790(LOC105069790),ncbi_105069791(DCAF7),ncbi_105069792(LOC1050697…
GO:0005575	Cellular Component	GO:0044464	cell part	59	0.30935	86.765	0.007	ncbi_105062966(UPF3B),ncbi_105062968(RPL39),ncbi_105062970(SEPT6),ncbi_105062974(SLC25A43),ncbi_105062989(NKAP),ncbi_105062990(SLC25A5),ncbi_105069778(CD79B),ncbi_105069779(LOC105069779),ncbi_105069781(PSMC5),ncbi_105069783(SMARCD2),ncbi_105069784(FTSJ3),ncbi_105069785(DDX42),ncbi_105069786(CCDC47),ncbi_105069787(STRADA),ncbi_105069790(LOC105069790),ncbi_105069791(DCAF7),ncbi_105069792(LOC1050697…
GO:0005575	Cellular Component	GO:0031012	extracellular matrix	3	0.371684	4.412	0.015	ncbi_105061970(COL4A5),ncbi_105061971(COL4A6),ncbi_105077748(AMELX)
GO:0005575	Cellular Component	GO:0031974	membrane-enclosed lumen	9	0.397693	13.235	0.009	ncbi_105069781(PSMC5),ncbi_105069787(STRADA),ncbi_105069791(DCAF7),ncbi_105075940(STAG2),ncbi_105082123(SKP1),ncbi_105082133(DDX46),ncbi_105083681(OGT),ncbi_105083683(TAF1),ncbi_105083687(NONO)
GO:0005575	Cellular Component	GO:0045202	synapse	2	0.548566	2.941	0.01	ncbi_105061970(COL4A5),ncbi_105075945(GRIA3)
GO:0005575	Cellular Component	GO:0044421	extracellular region part	5	0.582047	7.353	0.007	ncbi_105061970(COL4A5),ncbi_105062968(RPL39),ncbi_105066220(KL),ncbi_105069779(LOC105069779),ncbi_105069781(PSMC5)
GO:0005575	Cellular Component	GO:0005576	extracellular region	5	0.587421	7.353	0.007	ncbi_105061970(COL4A5),ncbi_105062968(RPL39),ncbi_105066220(KL),ncbi_105069779(LOC105069779),ncbi_105069781(PSMC5)
GO:0005575	Cellular Component	GO:0030054	cell junction	4	0.596166	5.882	0.007	ncbi_105079084(AMOT),ncbi_105079366(UBA1),ncbi_105083676(RPS4X),ncbi_105083728(GJB1)
GO:0005575	Cellular Component	GO:0099512	supramolecular fiber	1	0.622064	1.471	0.009	ncbi_105077746(MID1)
GO:0005575	Cellular Component	GO:0044425	membrane part	22	0.635203	32.353	0.006	ncbi_105062974(SLC25A43),ncbi_105062990(SLC25A5),ncbi_105066220(KL),ncbi_105067165(PCDH11X),ncbi_105069778(CD79B),ncbi_105069786(CCDC47),ncbi_105069793(LOC105069793),ncbi_105072888(SESTD1),ncbi_105075867(SLC25A53),ncbi_105075945(GRIA3),ncbi_105077954(CADM2),ncbi_105079084(AMOT),ncbi_105079359(SLC9A7),ncbi_105079360(RP2),ncbi_105079364(NDUFB11),ncbi_105079366(UBA1),ncbi_105079368(CDK16),ncbi_10508…
GO:0005575	Cellular Component	GO:0016020	membrane	29	0.644074	42.647	0.006	ncbi_105062974(SLC25A43),ncbi_105062990(SLC25A5),ncbi_105066220(KL),ncbi_105067165(PCDH11X),ncbi_105069778(CD79B),ncbi_105069779(LOC105069779),ncbi_105069786(CCDC47),ncbi_105069792(LOC105069792),ncbi_105069793(LOC105069793),ncbi_105072888(SESTD1),ncbi_105075867(SLC25A53),ncbi_105075940(STAG2),ncbi_105075945(GRIA3),ncbi_105077747(LOC105077747),ncbi_105077954(CADM2),ncbi_105079084(AMOT),ncbi_105079…
GO:0005575	Cellular Component	GO:0044456	synapse part	1	0.698324	1.471	0.006	ncbi_105075945(GRIA3)
